# Supplementary material for: Identifying and classifying shared selective sweeps from multilocus data
Source: bioRxiv or medRxiv preprint supplement (doi:10.1101/446005), 2019-04-05
Supplement: Supplementary file [file media-1.pdf]

Table S1: Critical values of  $|\text{SS-H12}|$  and  $|\text{SS-G123}|$  generated from  $10^6$  neutral replicates (identical for either statistic), used to assign  $p$ -values to empirical top candidates across 1000 Genomes Project [Auton et al., 2015] sampled population pairs.

| Population | SS-H12    | SS-G123   |
|------------|-----------|-----------|
| CEU-GBR    | 0.6151618 | 0.4017583 |
| CEU-GIH    | 0.2755997 | 0.0863085 |
| CEU-JPT    | 0.2800871 | 0.0717914 |
| CEU-YRI    | 0.3924851 | 0.1569262 |
| LWK-YRI    | 0.2065271 | 0.0395899 |
| GIH-YRI    | 0.2701381 | 0.0582839 |
| JPT-YRI    | 0.2408978 | 0.0450692 |
| JPT-GIH    | 0.1956585 | 0.0351749 |
| JPT-KHV    | 0.4114621 | 0.1926581 |

Table S2: Top 40 SS-H12 sweep candidates at RNA- and protein-coding genes shared between the Central and Western European CEU and GBR populations. Candidates presented are those that remained after application of a mappability and alignability filter to data (see *Materials and Methods*). Target genes that pass the significance threshold are colored in gold in the “*P*-value” column. Genes whose sweeps are assigned as hard ( $\nu = 1$ ) are shaded in red in the “Inferred  $\nu$ ” column, while soft sweeps ( $\nu \geq 2$ ) are colored in blue.

|    | Top gene     | Chromosome | Maximum SS-H12 | H2/H1       | <i>P</i> -value       | Inferred $\nu$ |
|----|--------------|------------|----------------|-------------|-----------------------|----------------|
| 1  | ZRANB3       | 2          | 0.6138516      | 0.005253369 | 2.0×10 <sup>-6</sup>  | 1              |
| 2  | SLC12A1      | 15         | 0.5964931      | 0.007102656 | 4.0×10 <sup>-6</sup>  | 1              |
| 3  | R3HDM1       | 2          | 0.5907587      | 0.005776011 | 4.0×10 <sup>-6</sup>  | 1              |
| 4  | DARS         | 2          | 0.5605804      | 0.012398870 | 1.6×10 <sup>-5</sup>  | 1              |
| 5  | MCM6         | 2          | 0.5604343      | 0.010608921 | 1.6×10 <sup>-5</sup>  | 1              |
| 6  | LCT          | 2          | 0.5097962      | 0.009314534 | 8.9×10 <sup>-5</sup>  | 1              |
| 7  | LOC100507600 | 2          | 0.5097962      | 0.009314534 | 8.9×10 <sup>-5</sup>  | 1              |
| 8  | AC093391.2   | 2          | 0.4822492      | 0.008069683 | 3.14×10 <sup>-4</sup> | 1              |
| 9  | RAB3GAP1     | 2          | 0.4788360      | 0.016863242 | 3.48×10 <sup>-4</sup> | 1              |
| 10 | UBXN4        | 2          | 0.4709547      | 0.008006012 | 4.45×10 <sup>-4</sup> | 1              |
| 11 | BCAS3        | 17         | 0.4342505      | 0.024135621 | 1.43×10 <sup>-3</sup> | 1              |
| 12 | KAT6B        | 10         | 0.4063248      | 0.010954181 | 3.11×10 <sup>-3</sup> | 1              |
| 13 | PPM1D        | 17         | 0.4043315      | 0.013758902 | 3.27×10 <sup>-3</sup> | 1              |
| 14 | MYO9A        | 15         | 0.3919436      | 0.014969493 | 4.55×10 <sup>-3</sup> | 1              |
| 15 | FAM149B1     | 10         | 0.3841613      | 0.013332285 | 5.56×10 <sup>-3</sup> | 1              |
| 16 | ZNF546       | 19         | 0.3824392      | 0.053683499 | 5.80×10 <sup>-3</sup> | 1              |
| 17 | MAP3K19      | 2          | 0.3807448      | 0.175652783 | 6.06×10 <sup>-3</sup> | 3              |
| 18 | PRMT9        | 4          | 0.3782229      | 0.030300365 | 6.48×10 <sup>-3</sup> | 1              |
| 19 | KITLG        | 12         | 0.3772852      | 0.023892213 | 6.64×10 <sup>-3</sup> | 1              |
| 20 | MLL3         | 9          | 0.3756959      | 0.085799301 | 6.92×10 <sup>-3</sup> | 1              |
| 21 | LAMA3        | 18         | 0.3749289      | 0.327190136 | 7.04×10 <sup>-3</sup> | 3              |
| 22 | TMEM116      | 12         | 0.3716065      | 0.023778920 | 7.60×10 <sup>-3</sup> | 1              |
| 23 | KMT2A        | 11         | 0.3684665      | 0.034335416 | 8.22×10 <sup>-3</sup> | 1              |
| 24 | ADRBK2       | 22         | 0.3648397      | 0.029916410 | 8.96×10 <sup>-3</sup> | 1              |
| 25 | ACMSD        | 2          | 0.3628647      | 0.058329766 | 9.40×10 <sup>-3</sup> | 1              |
| 26 | CCNT2-AS1    | 2          | 0.3628647      | 0.058329766 | 9.40×10 <sup>-3</sup> | 1              |
| 27 | PLAGL2       | 20         | 0.3588937      | 0.315722448 | 1.03×10 <sup>-2</sup> | 3              |
| 28 | DIRC3        | 2          | 0.3560424      | 0.021817335 | 1.10×10 <sup>-2</sup> | 1              |
| 29 | POLN         | 4          | 0.3534160      | 0.101220872 | 1.16×10 <sup>-2</sup> | 1              |
| 30 | AC005592.1   | 5          | 0.3518146      | 0.018718715 | 1.21×10 <sup>-2</sup> | 1              |
| 31 | PRKDC        | 8          | 0.3491810      | 0.262222086 | 1.28×10 <sup>-2</sup> | 4              |
| 32 | BVES-AS1     | 6          | 0.3486739      | 0.277810748 | 1.30×10 <sup>-2</sup> | 3              |
| 33 | PVRL3-AS1    | 3          | 0.3470860      | 0.045461392 | 1.34×10 <sup>-2</sup> | 1              |
| 34 | ECD          | 10         | 0.3464802      | 0.201522514 | 1.36×10 <sup>-2</sup> | 3              |
| 35 | CLK3         | 15         | 0.3446577      | 0.022635883 | 1.42×10 <sup>-2</sup> | 1              |
| 36 | C4orf22      | 4          | 0.3430783      | 0.034845848 | 1.47×10 <sup>-2</sup> | 1              |
| 37 | EPN2         | 17         | 0.3405261      | 0.099649864 | 1.56×10 <sup>-2</sup> | 1              |
| 38 | NR6A1        | 9          | 0.3385413      | 0.412935867 | 1.63×10 <sup>-2</sup> | 4              |
| 39 | CUX2         | 12         | 0.3370432      | 0.466497502 | 1.68×10 <sup>-2</sup> | 4              |
| 40 | MIR548O2     | 8          | 0.3367965      | 0.120149341 | 1.69×10 <sup>-2</sup> | 1              |

Table S3: Top 40 SS-H12 sweep candidates at RNA- and protein-coding genes shared between the Western European CEU and South Asian GIH populations. Candidates presented are those that remained after application of a mappability and alignability filter to data (see *Materials and Methods*). Target genes that pass the significance threshold are colored in gold in the “*P*-value” column. Genes whose sweeps are assigned as hard ( $\nu = 1$ ) are shaded in red in the “Inferred  $\nu$ ” column, while soft sweeps ( $\nu \geq 2$ ) are colored in blue.

|    | Top gene            | Chromosome | Maximum SS-H12 | H2/H1      | <i>P</i> -value      | Inferred $\nu$ |
|----|---------------------|------------|----------------|------------|----------------------|----------------|
| 1  | <i>SLC12A1</i>      | 15         | 0.4687775      | 0.01928730 | < 10 <sup>-6</sup>   | 1              |
| 2  | <i>PRMT9</i>        | 4          | 0.3592987      | 0.02846361 | < 10 <sup>-6</sup>   | 1              |
| 3  | <i>ZNF546</i>       | 19         | 0.3543484      | 0.01440592 | < 10 <sup>-6</sup>   | 1              |
| 4  | <i>RNU6-28P</i>     | 15         | 0.3328967      | 0.14154431 | < 10 <sup>-6</sup>   | 2              |
| 5  | <i>PPIP5K1</i>      | 15         | 0.3328967      | 0.14154431 | < 10 <sup>-6</sup>   | 2              |
| 6  | <i>CUX2</i>         | 12         | 0.3244117      | 0.01913100 | < 10 <sup>-6</sup>   | 1              |
| 7  | <i>RUNX1T1</i>      | 8          | 0.3239634      | 0.02660100 | < 10 <sup>-6</sup>   | 1              |
| 8  | <i>HDAC1</i>        | 1          | 0.3000066      | 0.02793417 | < 10 <sup>-6</sup>   | 1              |
| 9  | <i>KIAA0947</i>     | 5          | 0.2985386      | 0.09924729 | < 10 <sup>-6</sup>   | 1              |
| 10 | <i>LINC00478</i>    | 21         | 0.2978392      | 0.03430060 | < 10 <sup>-6</sup>   | 1              |
| 11 | <i>P4HA1</i>        | 10         | 0.2940247      | 0.02457430 | < 10 <sup>-6</sup>   | 1              |
| 12 | <i>BCAS3</i>        | 17         | 0.2928297      | 0.01725947 | < 10 <sup>-6</sup>   | 1              |
| 13 | <i>HS2ST1</i>       | 1          | 0.2925146      | 0.02843537 | < 10 <sup>-6</sup>   | 1              |
| 14 | <i>USP37</i>        | 2          | 0.2841170      | 0.26690328 | 1.0×10 <sup>-6</sup> | 2              |
| 15 | <i>EXOC6B</i>       | 2          | 0.2839310      | 0.03022084 | 1.0×10 <sup>-6</sup> | 1              |
| 16 | <i>TRMT11</i>       | 6          | 0.2823063      | 0.09785459 | 1.0×10 <sup>-6</sup> | 1              |
| 17 | <i>MYO9A</i>        | 15         | 0.2807536      | 0.02811068 | 1.0×10 <sup>-6</sup> | 1              |
| 18 | <i>TFAP2E</i>       | 1          | 0.2788397      | 0.19573284 | 1.0×10 <sup>-6</sup> | 2              |
| 19 | <i>PPM1D</i>        | 17         | 0.2780563      | 0.01891077 | 1.0×10 <sup>-6</sup> | 1              |
| 20 | <i>METTL25</i>      | 12         | 0.2774661      | 0.02117459 | 1.0×10 <sup>-6</sup> | 1              |
| 21 | <i>CCDC178</i>      | 18         | 0.2756744      | 0.08725221 | 1.0×10 <sup>-6</sup> | 1              |
| 22 | <i>USP25</i>        | 21         | 0.2754877      | 0.01694058 | 2.0×10 <sup>-6</sup> | 1              |
| 23 | <i>KIAA0825</i>     | 5          | 0.2741257      | 0.04268183 | 2.0×10 <sup>-6</sup> | 1              |
| 24 | <i>CELSR3</i>       | 3          | 0.2722865      | 0.04291467 | 2.0×10 <sup>-6</sup> | 1              |
| 25 | <i>LOC100188947</i> | 10         | 0.2716363      | 0.03509440 | 2.0×10 <sup>-6</sup> | 1              |
| 26 | <i>HECTD2</i>       | 10         | 0.2716363      | 0.03509440 | 2.0×10 <sup>-6</sup> | 1              |
| 27 | <i>GNA14</i>        | 9          | 0.2715994      | 0.03925893 | 2.0×10 <sup>-6</sup> | 1              |
| 28 | <i>DNAH6</i>        | 2          | 0.2696911      | 0.02045324 | 3.0×10 <sup>-6</sup> | 1              |
| 29 | <i>FBN1</i>         | 15         | 0.2693902      | 0.04027675 | 4.0×10 <sup>-6</sup> | 1              |
| 30 | <i>LYRM7</i>        | 5          | 0.2668650      | 0.04480839 | 5.0×10 <sup>-6</sup> | 1              |
| 31 | <i>KCNQ5</i>        | 6          | 0.2646294      | 0.01399575 | 6.0×10 <sup>-6</sup> | 1              |
| 32 | <i>OSBPL9</i>       | 1          | 0.2636045      | 0.04380993 | 6.0×10 <sup>-6</sup> | 1              |
| 33 | <i>OTUD6B</i>       | 8          | 0.2635197      | 0.16525761 | 6.0×10 <sup>-6</sup> | 2              |
| 34 | <i>C8orf44-SGK3</i> | 8          | 0.2629975      | 0.02040620 | 6.0×10 <sup>-6</sup> | 1              |
| 35 | <i>SGK3</i>         | 8          | 0.2629975      | 0.02040620 | 6.0×10 <sup>-6</sup> | 1              |
| 36 | <i>FAM69A</i>       | 1          | 0.2622265      | 0.06324476 | 7.0×10 <sup>-6</sup> | 1              |
| 37 | <i>UNC5D</i>        | 8          | 0.2610994      | 0.03623753 | 7.0×10 <sup>-6</sup> | 1              |
| 38 | <i>KITLG</i>        | 12         | 0.2607259      | 0.05006524 | 8.0×10 <sup>-6</sup> | 1              |
| 39 | <i>PSMB2</i>        | 1          | 0.2596058      | 0.02267442 | 1.0×10 <sup>-5</sup> | 1              |
| 40 | <i>MAP2K5</i>       | 15         | 0.2586188      | 0.33523411 | 1.1×10 <sup>-5</sup> | 2              |

Table S4: Top 40 SS-H12 sweep candidates at RNA- and protein-coding genes shared between the Western European CEU and East Asian JPT populations. Candidates presented are those that remained after application of a mappability and alignability filter to data (see *Materials and Methods*). Target genes that pass the significance threshold are colored in gold in the “*P*-value” column. Genes whose sweeps are assigned as hard ( $\nu = 1$ ) are shaded in red in the “Inferred  $\nu$ ” column, while soft sweeps ( $\nu \geq 2$ ) are colored in blue.

|    | Top gene            | Chromosome | Maximum SS-H12 | H2/H1      | <i>P</i> -value      | Inferred $\nu$ |
|----|---------------------|------------|----------------|------------|----------------------|----------------|
| 1  | <i>SPIDR</i>        | 8          | 0.4841559      | 0.13789164 | < 10 <sup>-6</sup>   | 2              |
| 2  | <i>MRAP2</i>        | 6          | 0.3577093      | 0.05691596 | < 10 <sup>-6</sup>   | 1              |
| 3  | <i>BVES-AS1</i>     | 6          | 0.3550710      | 0.35553104 | < 10 <sup>-6</sup>   | 2              |
| 4  | <i>BCAS3</i>        | 17         | 0.3003483      | 0.01124741 | < 10 <sup>-6</sup>   | 1              |
| 5  | <i>RUNX1T1</i>      | 8          | 0.2911443      | 0.01286325 | 1.0×10 <sup>-6</sup> | 1              |
| 6  | <i>DIRC3</i>        | 2          | 0.2846624      | 0.02342707 | 1.0×10 <sup>-6</sup> | 1              |
| 7  | <i>LINC00478</i>    | 21         | 0.2845995      | 0.04674953 | 1.0×10 <sup>-6</sup> | 1              |
| 8  | <i>CASC4</i>        | 15         | 0.2817489      | 0.28631390 | 1.0×10 <sup>-6</sup> | 2              |
| 9  | <i>ZNF546</i>       | 19         | 0.2775094      | 0.01187426 | 2.0×10 <sup>-6</sup> | 1              |
| 10 | <i>C16orf70</i>     | 16         | 0.2759704      | 0.15519459 | 2.0×10 <sup>-6</sup> | 2              |
| 11 | <i>CUX2</i>         | 12         | 0.2711322      | 0.07265968 | 3.0×10 <sup>-6</sup> | 1              |
| 12 | <i>C4orf22</i>      | 4          | 0.2676980      | 0.04613398 | 3.0×10 <sup>-6</sup> | 1              |
| 13 | <i>HDAC1</i>        | 1          | 0.2613163      | 0.01923077 | 4.0×10 <sup>-6</sup> | 1              |
| 14 | <i>EXOC6B</i>       | 2          | 0.2550717      | 0.02907524 | 6.0×10 <sup>-6</sup> | 1              |
| 15 | <i>NCAPG</i>        | 4          | 0.2540412      | 0.47979575 | 6.0×10 <sup>-6</sup> | 3              |
| 16 | <i>DENND1A</i>      | 9          | 0.2502850      | 0.03534972 | 8.0×10 <sup>-6</sup> | 1              |
| 17 | <i>LRRC29</i>       | 16         | 0.2498870      | 0.01559488 | 8.0×10 <sup>-6</sup> | 1              |
| 18 | <i>ZNF780B</i>      | 19         | 0.2453862      | 0.01894595 | 1.2×10 <sup>-5</sup> | 1              |
| 19 | <i>C12orf4</i>      | 12         | 0.2413896      | 0.05908229 | 1.2×10 <sup>-5</sup> | 1              |
| 20 | <i>MRPS11</i>       | 15         | 0.2379901      | 0.04262436 | 1.6×10 <sup>-5</sup> | 1              |
| 21 | <i>USP25</i>        | 21         | 0.2354323      | 0.03030037 | 1.7×10 <sup>-5</sup> | 1              |
| 22 | <i>EPB41L1</i>      | 20         | 0.2351457      | 0.05879280 | 1.7×10 <sup>-5</sup> | 1              |
| 23 | <i>LCORL</i>        | 4          | 0.2345143      | 0.49844508 | 1.7×10 <sup>-5</sup> | 3              |
| 24 | <i>NR6A1</i>        | 9          | 0.2344024      | 0.41874136 | 1.7×10 <sup>-5</sup> | 3              |
| 25 | <i>FOXP2</i>        | 7          | 0.2320563      | 0.06177330 | 1.8×10 <sup>-5</sup> | 1              |
| 26 | <i>PRKDC</i>        | 8          | 0.2316219      | 0.02158066 | 1.8×10 <sup>-5</sup> | 1              |
| 27 | <i>CELSR3</i>       | 3          | 0.2282892      | 0.03061224 | 2.0×10 <sup>-5</sup> | 1              |
| 28 | <i>C2CD5</i>        | 12         | -0.2282773     | 0.40252754 | 2.0×10 <sup>-5</sup> | 1              |
| 29 | <i>LOC100130987</i> | 11         | 0.2266829      | 0.03103294 | 2.1×10 <sup>-5</sup> | 1              |
| 30 | <i>EPS8</i>         | 12         | 0.2262990      | 0.03675885 | 2.1×10 <sup>-5</sup> | 1              |
| 31 | <i>C5orf42</i>      | 5          | 0.2258946      | 0.23871429 | 2.2×10 <sup>-5</sup> | 2              |
| 32 | <i>SGCD</i>         | 5          | 0.2248583      | 0.04520540 | 2.3×10 <sup>-5</sup> | 1              |
| 33 | <i>PHF20</i>        | 20         | 0.2247397      | 0.03888761 | 2.3×10 <sup>-5</sup> | 1              |
| 34 | <i>KIAA1324L</i>    | 7          | 0.2246612      | 0.05278810 | 2.3×10 <sup>-5</sup> | 1              |
| 35 | <i>SPIN1</i>        | 9          | 0.2244122      | 0.02988283 | 2.5×10 <sup>-5</sup> | 1              |
| 36 | <i>KCND2</i>        | 7          | 0.2238942      | 0.03960568 | 2.6×10 <sup>-5</sup> | 1              |
| 37 | <i>DNAH6</i>        | 2          | 0.2228843      | 0.04768519 | 2.6×10 <sup>-5</sup> | 1              |
| 38 | <i>CCBL2</i>        | 1          | 0.2220159      | 0.38969612 | 2.6×10 <sup>-5</sup> | 2              |
| 39 | <i>DBT</i>          | 1          | 0.2211143      | 0.02032617 | 2.8×10 <sup>-5</sup> | 1              |
| 40 | <i>CLCF1</i>        | 11         | 0.2209926      | 0.03304531 | 2.8×10 <sup>-5</sup> | 1              |

Table S5: Top 40 SS-H12 sweep candidates at RNA- and protein-coding genes shared between the Central European CEU and West African YRI populations. Candidates presented are those that remained after application of a mappability and alignability filter to data (see *Materials and Methods*). Target genes that pass the significance threshold are colored in gold in the “*P*-value” column. Genes whose sweeps are assigned as hard ( $\nu = 1$ ) are shaded in red in the “Inferred  $\nu$ ” column, while soft sweeps ( $\nu \geq 2$ ) are colored in blue.

|    | Top gene             | Chromosome | Maximum SS-H12 | H2/H1       | <i>P</i> -value       | Inferred $\nu$ |
|----|----------------------|------------|----------------|-------------|-----------------------|----------------|
| 1  | <i>RP11-554F20.1</i> | 9          | 0.4040332      | 0.011758418 | 1.0×10 <sup>-6</sup>  | 1              |
| 2  | <i>SPRED3</i>        | 19         | 0.3495697      | 0.008281479 | 2.0×10 <sup>-6</sup>  | 1              |
| 3  | <i>CASC4</i>         | 15         | 0.3448822      | 0.018257129 | 3.0×10 <sup>-6</sup>  | 1              |
| 4  | <i>KIAA0825</i>      | 5          | 0.3445359      | 0.023951998 | 3.0×10 <sup>-6</sup>  | 1              |
| 5  | <i>ERLIN2</i>        | 8          | 0.3313498      | 0.020023226 | 7.0×10 <sup>-6</sup>  | 1              |
| 6  | <i>DEDD</i>          | 1          | 0.3260732      | 0.060157676 | 8.0×10 <sup>-6</sup>  | 1              |
| 7  | <i>PHKB</i>          | 16         | 0.3236909      | 0.034041921 | 1.0×10 <sup>-5</sup>  | 1              |
| 8  | <i>CPNE1</i>         | 20         | 0.3176717      | 0.029957092 | 1.3×10 <sup>-5</sup>  | 1              |
| 9  | <i>NNT</i>           | 5          | 0.3171650      | 0.017917746 | 1.3×10 <sup>-5</sup>  | 1              |
| 10 | <i>ATP6V1A</i>       | 3          | 0.3132683      | 0.142126360 | 1.7×10 <sup>-5</sup>  | 1              |
| 11 | <i>DDHD2</i>         | 8          | 0.3089642      | 0.058367643 | 2.1×10 <sup>-5</sup>  | 1              |
| 12 | <i>GLRX2</i>         | 1          | 0.3053542      | 0.233674193 | 2.7×10 <sup>-5</sup>  | 2              |
| 13 | <i>DANCR</i>         | 4          | 0.3039967      | 0.040780000 | 2.8×10 <sup>-5</sup>  | 1              |
| 14 | <i>PIGV</i>          | 1          | 0.3036567      | 0.025363186 | 2.9×10 <sup>-5</sup>  | 1              |
| 15 | <i>USP46</i>         | 4          | 0.2995560      | 0.079339450 | 3.3×10 <sup>-5</sup>  | 1              |
| 16 | <i>RALGAPA2</i>      | 20         | 0.2991084      | 0.025897884 | 3.4×10 <sup>-5</sup>  | 1              |
| 17 | <i>GRIK5</i>         | 19         | 0.2981553      | 0.029953502 | 3.5×10 <sup>-5</sup>  | 1              |
| 18 | <i>PLEKHA8</i>       | 7          | 0.2975913      | 0.086839818 | 3.6×10 <sup>-5</sup>  | 1              |
| 19 | <i>MIR548H3</i>      | 6          | 0.2961103      | 0.037196110 | 3.7×10 <sup>-5</sup>  | 1              |
| 20 | <i>PAWR</i>          | 12         | -0.2904662     | 0.440909091 | 4.3×10 <sup>-5</sup>  | 1              |
| 21 | <i>ENTHD1</i>        | 22         | 0.2886265      | 0.085943221 | 4.4×10 <sup>-5</sup>  | 1              |
| 22 | <i>GRIA2</i>         | 4          | 0.2846541      | 0.121846119 | 4.8×10 <sup>-5</sup>  | 1              |
| 23 | <i>DKK2</i>          | 4          | 0.2823235      | 0.022479797 | 5.4×10 <sup>-5</sup>  | 1              |
| 24 | <i>C2orf69</i>       | 2          | 0.2793307      | 0.144744191 | 6.1×10 <sup>-5</sup>  | 1              |
| 25 | <i>ATF2</i>          | 2          | 0.2722884      | 0.046899637 | 7.2×10 <sup>-5</sup>  | 1              |
| 26 | <i>PPAPDC1B</i>      | 8          | 0.2713097      | 0.048928393 | 7.5×10 <sup>-5</sup>  | 1              |
| 27 | <i>CNNM2</i>         | 10         | 0.2699270      | 0.042492595 | 8.0×10 <sup>-5</sup>  | 1              |
| 28 | <i>KIAA1244</i>      | 6          | 0.2590398      | 0.023619457 | 1.21×10 <sup>-4</sup> | 1              |
| 29 | <i>GABRA4</i>        | 4          | 0.2587261      | 0.254620730 | 1.23×10 <sup>-4</sup> | 3              |
| 30 | <i>SLC4A10</i>       | 2          | 0.2583449      | 0.033468250 | 1.25×10 <sup>-4</sup> | 1              |
| 31 | <i>TGFBR1</i>        | 9          | 0.2583162      | 0.097024952 | 1.25×10 <sup>-4</sup> | 1              |
| 32 | <i>CDK6</i>          | 7          | 0.2580913      | 0.019577085 | 1.26×10 <sup>-4</sup> | 1              |
| 33 | <i>PHF20</i>         | 20         | 0.2560493      | 0.024958371 | 1.29×10 <sup>-4</sup> | 1              |
| 34 | <i>SEMA3C</i>        | 7          | 0.2490896      | 0.038386148 | 1.65×10 <sup>-4</sup> | 1              |
| 35 | <i>SPG11</i>         | 15         | 0.2474120      | 0.038898738 | 1.74×10 <sup>-4</sup> | 1              |
| 36 | <i>EXOC4</i>         | 7          | 0.2460852      | 0.068343293 | 1.84×10 <sup>-4</sup> | 1              |
| 37 | <i>ABHD17B</i>       | 9          | 0.2443668      | 0.067033633 | 1.99×10 <sup>-4</sup> | 1              |
| 38 | <i>SYT1</i>          | 12         | 0.2427578      | 0.071155043 | 2.09×10 <sup>-4</sup> | 1              |
| 39 | <i>ITFG1</i>         | 16         | 0.2415787      | 0.064650360 | 2.18×10 <sup>-4</sup> | 1              |
| 40 | <i>WHSC1L1</i>       | 8          | 0.2411594      | 0.091198255 | 2.20×10 <sup>-4</sup> | 1              |

Table S6: Top 40 SS-H12 sweep candidates at RNA- and protein-coding genes shared between the East African LWK and West African YRI populations. Candidates presented are those that remained after application of a mappability and alignability filter to data (see *Materials and Methods*). Target genes that pass the significance threshold are colored in gold in the “*P*-value” column. Genes whose sweeps are assigned as hard ( $\nu = 1$ ) are shaded in red in the “Inferred  $\nu$ ” column, while soft sweeps ( $\nu \geq 2$ ) are colored in blue.

|    | Top gene             | Chromosome | Maximum SS-H12 | H2/H1      | <i>P</i> -value    | Inferred $\nu$ |
|----|----------------------|------------|----------------|------------|--------------------|----------------|
| 1  | <i>GRIK5</i>         | 19         | 0.4257102      | 0.04258992 | < 10 <sup>-6</sup> | 1              |
| 2  | <i>RGS18</i>         | 1          | 0.3987118      | 0.05121985 | < 10 <sup>-6</sup> | 1              |
| 3  | <i>RP11-554F20.1</i> | 9          | 0.3888096      | 0.03007582 | < 10 <sup>-6</sup> | 1              |
| 4  | <i>SPIDR</i>         | 8          | 0.3877237      | 0.47505841 | < 10 <sup>-6</sup> | 2              |
| 5  | <i>KIAA0825</i>      | 5          | 0.3792208      | 0.06521739 | < 10 <sup>-6</sup> | 1              |
| 6  | <i>ARID1A</i>        | 1          | 0.3696765      | 0.05678665 | < 10 <sup>-6</sup> | 1              |
| 7  | <i>PPAPDC1B</i>      | 8          | 0.3677224      | 0.02213772 | < 10 <sup>-6</sup> | 1              |
| 8  | <i>MIR548AE2</i>     | 16         | 0.3602984      | 0.01837085 | < 10 <sup>-6</sup> | 1              |
| 9  | <i>LONP2</i>         | 16         | 0.3602984      | 0.01837085 | < 10 <sup>-6</sup> | 1              |
| 10 | <i>NNT</i>           | 5          | 0.3578539      | 0.01703393 | < 10 <sup>-6</sup> | 1              |
| 11 | <i>ATF2</i>          | 2          | 0.3566302      | 0.10607443 | < 10 <sup>-6</sup> | 1              |
| 12 | <i>CASC4</i>         | 15         | 0.3498801      | 0.02336532 | < 10 <sup>-6</sup> | 1              |
| 13 | <i>PIGV</i>          | 1          | 0.3469070      | 0.01980346 | < 10 <sup>-6</sup> | 1              |
| 14 | <i>BRIP1</i>         | 17         | 0.3454437      | 0.05989424 | < 10 <sup>-6</sup> | 1              |
| 15 | <i>FLJ46284</i>      | 8          | 0.3335889      | 0.34581390 | < 10 <sup>-6</sup> | 2              |
| 16 | <i>FER1L6</i>        | 8          | 0.3319929      | 0.36210558 | < 10 <sup>-6</sup> | 2              |
| 17 | <i>FER1L6-AS1</i>    | 8          | 0.3319929      | 0.36210558 | < 10 <sup>-6</sup> | 2              |
| 18 | <i>PSMD14</i>        | 2          | 0.3302383      | 0.21238349 | < 10 <sup>-6</sup> | 2              |
| 19 | <i>EHBP1</i>         | 2          | 0.3301406      | 0.04231345 | < 10 <sup>-6</sup> | 1              |
| 20 | <i>SYT1</i>          | 12         | 0.3268402      | 0.02131281 | < 10 <sup>-6</sup> | 1              |
| 21 | <i>MAGI3</i>         | 1          | 0.3234881      | 0.03887382 | < 10 <sup>-6</sup> | 1              |
| 22 | <i>DDHD2</i>         | 8          | 0.3230242      | 0.03319609 | < 10 <sup>-6</sup> | 1              |
| 23 | <i>TCF4</i>          | 18         | 0.3221087      | 0.04095041 | < 10 <sup>-6</sup> | 1              |
| 24 | <i>FGFR1</i>         | 8          | 0.3219437      | 0.11190389 | < 10 <sup>-6</sup> | 1              |
| 25 | <i>DANCR</i>         | 4          | 0.3217441      | 0.02757380 | < 10 <sup>-6</sup> | 1              |
| 26 | <i>DDX19B</i>        | 16         | 0.3201310      | 0.05961249 | < 10 <sup>-6</sup> | 1              |
| 27 | <i>PHKB</i>          | 16         | 0.3199744      | 0.14290567 | < 10 <sup>-6</sup> | 2              |
| 28 | <i>RRN3P3</i>        | 16         | 0.3192156      | 0.12601099 | < 10 <sup>-6</sup> | 2              |
| 29 | <i>ANK3</i>          | 10         | 0.3168877      | 0.41411632 | < 10 <sup>-6</sup> | 2              |
| 30 | <i>CNNM2</i>         | 10         | 0.3157693      | 0.04354118 | < 10 <sup>-6</sup> | 1              |
| 31 | <i>DKK2</i>          | 4          | 0.3148797      | 0.02507450 | < 10 <sup>-6</sup> | 1              |
| 32 | <i>UCHL5</i>         | 1          | 0.3148279      | 0.23817198 | < 10 <sup>-6</sup> | 2              |
| 33 | <i>GRIA4</i>         | 11         | 0.3093281      | 0.06513791 | < 10 <sup>-6</sup> | 1              |
| 34 | <i>HEMGN</i>         | 9          | 0.3087151      | 0.03213826 | < 10 <sup>-6</sup> | 1              |
| 35 | <i>RNLS</i>          | 10         | 0.3086794      | 0.05394666 | < 10 <sup>-6</sup> | 1              |
| 36 | <i>TMC1</i>          | 9          | 0.3059124      | 0.05989460 | < 10 <sup>-6</sup> | 1              |
| 37 | <i>FAM172A</i>       | 5          | 0.3046091      | 0.36377588 | < 10 <sup>-6</sup> | 2              |
| 38 | <i>NANS</i>          | 9          | 0.3022555      | 0.14421537 | < 10 <sup>-6</sup> | 2              |
| 39 | <i>SPRED3</i>        | 19         | 0.3006544      | 0.01691324 | < 10 <sup>-6</sup> | 1              |
| 40 | <i>CCDC178</i>       | 18         | 0.3005286      | 0.06074190 | < 10 <sup>-6</sup> | 1              |

Table S7: Top 40 SS-H12 sweep candidates at RNA- and protein-coding genes shared between the South Asian GIH and West African YRI populations. Candidates presented are those that remained after application of a mappability and alignability filter to data (see *Materials and Methods*). Target genes that pass the significance threshold are colored in gold in the “*P*-value” column. Genes whose sweeps are assigned as hard ( $\nu = 1$ ) are shaded in red in the “Inferred  $\nu$ ” column, while soft sweeps ( $\nu \geq 2$ ) are colored in blue.

|    | Top gene             | Chromosome | Maximum SS-H12 | H2/H1       | <i>P</i> -value      | Inferred $\nu$ |
|----|----------------------|------------|----------------|-------------|----------------------|----------------|
| 1  | <i>RP11-554F20.1</i> | 9          | 0.3771248      | 0.011770772 | < 10 <sup>-6</sup>   | 1              |
| 2  | <i>ATP6V1A</i>       | 3          | 0.3639640      | 0.099682934 | < 10 <sup>-6</sup>   | 1              |
| 3  | <i>DDHD2</i>         | 8          | 0.3602952      | 0.013720551 | < 10 <sup>-6</sup>   | 1              |
| 4  | <i>CDK6</i>          | 7          | 0.3578316      | 0.071008263 | < 10 <sup>-6</sup>   | 1              |
| 5  | <i>KIAA0825</i>      | 5          | 0.3525741      | 0.027694560 | < 10 <sup>-6</sup>   | 1              |
| 6  | <i>SYT1</i>          | 12         | 0.3492609      | 0.012266522 | < 10 <sup>-6</sup>   | 1              |
| 7  | <i>PSMD14</i>        | 2          | 0.3412286      | 0.135670252 | < 10 <sup>-6</sup>   | 1              |
| 8  | <i>WHSC1L1</i>       | 8          | 0.3283306      | 0.043503219 | < 10 <sup>-6</sup>   | 1              |
| 9  | <i>PHKB</i>          | 16         | 0.3232317      | 0.042223410 | < 10 <sup>-6</sup>   | 1              |
| 10 | <i>NNT</i>           | 5          | 0.3223767      | 0.017984343 | < 10 <sup>-6</sup>   | 1              |
| 11 | <i>PPAPDC1B</i>      | 8          | 0.3196440      | 0.032132443 | < 10 <sup>-6</sup>   | 1              |
| 12 | <i>FBXW4</i>         | 10         | 0.3196397      | 0.031138790 | < 10 <sup>-6</sup>   | 1              |
| 13 | <i>CASC4</i>         | 15         | 0.3150844      | 0.009182066 | < 10 <sup>-6</sup>   | 1              |
| 14 | <i>PLEKHA8</i>       | 7          | 0.3142622      | 0.083226858 | < 10 <sup>-6</sup>   | 1              |
| 15 | <i>PIGV</i>          | 1          | 0.3115851      | 0.031716870 | < 10 <sup>-6</sup>   | 1              |
| 16 | <i>ZNF451</i>        | 6          | 0.3085450      | 0.029623301 | < 10 <sup>-6</sup>   | 1              |
| 17 | <i>MIR548AE2</i>     | 16         | 0.3065668      | 0.025105816 | < 10 <sup>-6</sup>   | 1              |
| 18 | <i>LONP2</i>         | 16         | 0.3065668      | 0.025105816 | < 10 <sup>-6</sup>   | 1              |
| 19 | <i>SLC4A10</i>       | 2          | 0.3062220      | 0.024992628 | < 10 <sup>-6</sup>   | 1              |
| 20 | <i>DEDD</i>          | 1          | 0.2978007      | 0.043610857 | < 10 <sup>-6</sup>   | 1              |
| 21 | <i>USP46</i>         | 4          | 0.2930645      | 0.043401898 | < 10 <sup>-6</sup>   | 1              |
| 22 | <i>ATF2</i>          | 2          | 0.2890980      | 0.042325935 | < 10 <sup>-6</sup>   | 1              |
| 23 | <i>C10orf76</i>      | 10         | 0.2791604      | 0.241890959 | < 10 <sup>-6</sup>   | 2              |
| 24 | <i>GRIK5</i>         | 19         | 0.2789334      | 0.026200519 | < 10 <sup>-6</sup>   | 1              |
| 25 | <i>FRYL</i>          | 4          | 0.2770178      | 0.124549768 | < 10 <sup>-6</sup>   | 1              |
| 26 | <i>ABHD17B</i>       | 9          | 0.2761729      | 0.019974819 | 1.0×10 <sup>-6</sup> | 1              |
| 27 | <i>CPNE1</i>         | 20         | 0.2749730      | 0.053890867 | 1.0×10 <sup>-6</sup> | 1              |
| 28 | <i>RALGAPA2</i>      | 20         | 0.2742919      | 0.031716870 | 1.0×10 <sup>-6</sup> | 1              |
| 29 | <i>COL7A1</i>        | 3          | 0.2710832      | 0.030527862 | 1.0×10 <sup>-6</sup> | 1              |
| 30 | <i>PAWR</i>          | 12         | -0.2695280     | 0.500033047 | 2.0×10 <sup>-6</sup> | 1              |
| 31 | <i>ERLIN2</i>        | 8          | 0.2694367      | 0.032420110 | 2.0×10 <sup>-6</sup> | 1              |
| 32 | <i>TYW5</i>          | 2          | 0.2662606      | 0.079070667 | 2.0×10 <sup>-6</sup> | 1              |
| 33 | <i>KCNIP2</i>        | 10         | 0.2654300      | 0.188650307 | 2.0×10 <sup>-6</sup> | 2              |
| 34 | <i>ENTHD1</i>        | 22         | 0.2648954      | 0.059516605 | 2.0×10 <sup>-6</sup> | 1              |
| 35 | <i>CADM1</i>         | 11         | 0.2608986      | 0.130764109 | 2.0×10 <sup>-6</sup> | 1              |
| 36 | <i>NIT1</i>          | 1          | 0.2589696      | 0.060503570 | 2.0×10 <sup>-6</sup> | 1              |
| 37 | <i>GRIA4</i>         | 11         | 0.2580788      | 0.177060197 | 2.0×10 <sup>-6</sup> | 2              |
| 38 | <i>CAMK2G</i>        | 10         | 0.2552114      | 0.145238523 | 3.0×10 <sup>-6</sup> | 1              |
| 39 | <i>DANCR</i>         | 4          | 0.2530703      | 0.034185402 | 3.0×10 <sup>-6</sup> | 1              |
| 40 | <i>PLBD2</i>         | 12         | 0.2530187      | 0.025798687 | 3.0×10 <sup>-6</sup> | 1              |

Table S8: Top 40 SS-H12 sweep candidates at RNA- and protein-coding genes shared between the East Asian JPT and West African YRI populations. Candidates presented are those that remained after application of a mappability and alignability filter to data (see *Materials and Methods*). Target genes that pass the significance threshold are colored in gold in the “*P*-value” column. Genes whose sweeps are assigned as hard ( $\nu = 1$ ) are shaded in red in the “Inferred  $\nu$ ” column, while soft sweeps ( $\nu \geq 2$ ) are colored in blue.

|    | Top gene             | Chromosome | Maximum SS-H12 | H2/H1       | <i>P</i> -value      | Inferred $\nu$ |
|----|----------------------|------------|----------------|-------------|----------------------|----------------|
| 1  | <i>RP11-554F20.1</i> | 9          | 0.3931760      | 0.106986532 | < 10 <sup>-6</sup>   | 1              |
| 2  | <i>HEMGN</i>         | 9          | 0.3775289      | 0.024845674 | < 10 <sup>-6</sup>   | 1              |
| 3  | <i>ATP6V1A</i>       | 3          | 0.3612693      | 0.187013598 | < 10 <sup>-6</sup>   | 3              |
| 4  | <i>PSMD14</i>        | 2          | 0.3478155      | 0.120552739 | < 10 <sup>-6</sup>   | 1              |
| 5  | <i>KIAA0825</i>      | 5          | 0.3462541      | 0.042399755 | < 10 <sup>-6</sup>   | 1              |
| 6  | <i>ENTHD1</i>        | 22         | 0.3457729      | 0.024417586 | < 10 <sup>-6</sup>   | 1              |
| 7  | <i>UCHL5</i>         | 1          | 0.3410178      | 0.296451830 | < 10 <sup>-6</sup>   | 2              |
| 8  | <i>EHBP1</i>         | 2          | 0.3296022      | 0.040707208 | < 10 <sup>-6</sup>   | 1              |
| 9  | <i>DDHD2</i>         | 8          | 0.3232796      | 0.047658115 | < 10 <sup>-6</sup>   | 1              |
| 10 | <i>GRIK5</i>         | 19         | 0.3201569      | 0.022160505 | < 10 <sup>-6</sup>   | 1              |
| 11 | <i>CPNE1</i>         | 20         | 0.3095707      | 0.020447795 | < 10 <sup>-6</sup>   | 1              |
| 12 | <i>CASC4</i>         | 15         | 0.3082424      | 0.008452639 | < 10 <sup>-6</sup>   | 1              |
| 13 | <i>PIGV</i>          | 1          | 0.3080457      | 0.019652483 | < 10 <sup>-6</sup>   | 1              |
| 14 | <i>GRIA4</i>         | 11         | 0.2877642      | 0.076983380 | < 10 <sup>-6</sup>   | 1              |
| 15 | <i>FBXW4</i>         | 10         | 0.2812126      | 0.032817676 | < 10 <sup>-6</sup>   | 1              |
| 16 | <i>USP46</i>         | 4          | 0.2778346      | 0.050033190 | < 10 <sup>-6</sup>   | 1              |
| 17 | <i>PPAPDC1B</i>      | 8          | 0.2770218      | 0.067697788 | < 10 <sup>-6</sup>   | 1              |
| 18 | <i>CSMD3</i>         | 8          | 0.2767410      | 0.025265593 | < 10 <sup>-6</sup>   | 1              |
| 19 | <i>AUTS2</i>         | 7          | 0.2739576      | 0.048349205 | < 10 <sup>-6</sup>   | 1              |
| 20 | <i>WDPCP</i>         | 2          | 0.2732119      | 0.160070411 | < 10 <sup>-6</sup>   | 2              |
| 21 | <i>NNT</i>           | 5          | 0.2719657      | 0.011428056 | < 10 <sup>-6</sup>   | 1              |
| 22 | <i>WDR75</i>         | 2          | 0.2713068      | 0.477669319 | < 10 <sup>-6</sup>   | 3              |
| 23 | <i>MAST2</i>         | 1          | 0.2710749      | 0.113317105 | < 10 <sup>-6</sup>   | 1              |
| 24 | <i>MPHOSPH9</i>      | 12         | -0.2671972     | 0.500226740 | 1.0×10 <sup>-6</sup> | 1              |
| 25 | <i>ATF2</i>          | 2          | 0.2661096      | 0.050953776 | 1.0×10 <sup>-6</sup> | 1              |
| 26 | <i>MIR548H3</i>      | 6          | 0.2657886      | 0.044716955 | 1.0×10 <sup>-6</sup> | 1              |
| 27 | <i>DKK2</i>          | 4          | 0.2654977      | 0.020832637 | 1.0×10 <sup>-6</sup> | 1              |
| 28 | <i>RALGAPA2</i>      | 20         | 0.2634601      | 0.018345166 | 1.0×10 <sup>-6</sup> | 1              |
| 29 | <i>PLEKHA8</i>       | 7          | 0.2629720      | 0.065646654 | 1.0×10 <sup>-6</sup> | 1              |
| 30 | <i>ABCA17P</i>       | 16         | 0.2627850      | 0.029987576 | 1.0×10 <sup>-6</sup> | 1              |
| 31 | <i>ERLIN2</i>        | 8          | 0.2612417      | 0.051206414 | 1.0×10 <sup>-6</sup> | 1              |
| 32 | <i>LOC644554</i>     | 19         | 0.2599085      | 0.046211073 | 1.0×10 <sup>-6</sup> | 1              |
| 33 | <i>EXOC6B</i>        | 2          | -0.2591453     | 0.400289321 | 1.0×10 <sup>-6</sup> | 1              |
| 34 | <i>ARID1A</i>        | 1          | 0.2586148      | 0.012315850 | 1.0×10 <sup>-6</sup> | 1              |
| 35 | <i>AC016582.2</i>    | 19         | 0.2575930      | 0.184115407 | 1.0×10 <sup>-6</sup> | 2              |
| 36 | <i>USP31</i>         | 16         | 0.2542219      | 0.048774295 | 1.0×10 <sup>-6</sup> | 1              |
| 37 | <i>WDR87</i>         | 19         | 0.2539212      | 0.052847194 | 1.0×10 <sup>-6</sup> | 1              |
| 38 | <i>NCK1</i>          | 3          | 0.2533815      | 0.105668649 | 1.0×10 <sup>-6</sup> | 1              |
| 39 | <i>MIR548AE2</i>     | 16         | 0.2530337      | 0.012070399 | 1.0×10 <sup>-6</sup> | 1              |
| 40 | <i>LONP2</i>         | 16         | 0.2530337      | 0.012070399 | 1.0×10 <sup>-6</sup> | 1              |



Table S9: Top 40 SS-H12 sweep candidates at RNA- and protein-coding genes shared between the East Asian JPT and South Asian GIH populations. Candidates presented are those that remained after application of a mappability and alignability filter to data (see *Materials and Methods*). Target genes that pass the significance threshold are colored in gold in the “*P*-value” column. Genes whose sweeps are assigned as hard ( $\nu = 1$ ) are shaded in red in the “Inferred  $\nu$ ” column, while soft sweeps ( $\nu \geq 2$ ) are colored in blue.

|    | Top gene             | Chromosome | Maximum SS-H12 | H2/H1       | <i>P</i> -value    | Inferred $\nu$ |
|----|----------------------|------------|----------------|-------------|--------------------|----------------|
| 1  | <i>RUNX1T1</i>       | 8          | 0.4474761      | 0.013112088 | < 10 <sup>-6</sup> | 1              |
| 2  | <i>P4HTM</i>         | 3          | 0.4140126      | 0.004079071 | < 10 <sup>-6</sup> | 1              |
| 3  | <i>TMTC2</i>         | 12         | 0.3420391      | 0.025676243 | < 10 <sup>-6</sup> | 1              |
| 4  | <i>EXOC6B</i>        | 2          | 0.3326926      | 0.019515562 | < 10 <sup>-6</sup> | 1              |
| 5  | <i>RNF121</i>        | 11         | 0.3155150      | 0.030228890 | < 10 <sup>-6</sup> | 1              |
| 6  | <i>BCAS3</i>         | 17         | 0.3120734      | 0.020570739 | < 10 <sup>-6</sup> | 1              |
| 7  | <i>HELZ</i>          | 17         | 0.3098360      | 0.111157784 | < 10 <sup>-6</sup> | 1              |
| 8  | <i>ADAMTS6</i>       | 5          | 0.3076773      | 0.407162839 | < 10 <sup>-6</sup> | 3              |
| 9  | <i>ORC2</i>          | 2          | 0.3055687      | 0.018545289 | < 10 <sup>-6</sup> | 1              |
| 10 | <i>CUX2</i>          | 12         | 0.3012879      | 0.114717964 | < 10 <sup>-6</sup> | 1              |
| 11 | <i>APPBP2</i>        | 17         | 0.2943597      | 0.018755226 | < 10 <sup>-6</sup> | 1              |
| 12 | <i>ZNF546</i>        | 19         | 0.2903935      | 0.026486969 | < 10 <sup>-6</sup> | 1              |
| 13 | <i>RP11-682N22.1</i> | 7          | 0.2866539      | 0.025520555 | < 10 <sup>-6</sup> | 1              |
| 14 | <i>LINC00478</i>     | 21         | 0.2768036      | 0.051422319 | < 10 <sup>-6</sup> | 1              |
| 15 | <i>DBT</i>           | 1          | 0.2754919      | 0.019618240 | < 10 <sup>-6</sup> | 1              |
| 16 | <i>SLC44A1</i>       | 9          | 0.2751889      | 0.027447371 | < 10 <sup>-6</sup> | 1              |
| 17 | <i>DPH5</i>          | 1          | 0.2734798      | 0.063964153 | < 10 <sup>-6</sup> | 1              |
| 18 | <i>MBOAT2</i>        | 2          | 0.2732935      | 0.022872389 | < 10 <sup>-6</sup> | 1              |
| 19 | <i>DR1</i>           | 1          | 0.2719058      | 0.117944872 | < 10 <sup>-6</sup> | 1              |
| 20 | <i>ZNF780B</i>       | 19         | 0.2710979      | 0.027775374 | < 10 <sup>-6</sup> | 1              |
| 21 | <i>PRPF40B</i>       | 12         | 0.2704860      | 0.009056569 | < 10 <sup>-6</sup> | 1              |
| 22 | <i>LOC100188947</i>  | 10         | 0.2693331      | 0.091476681 | < 10 <sup>-6</sup> | 1              |
| 23 | <i>HECTD2</i>        | 10         | 0.2693331      | 0.091476681 | < 10 <sup>-6</sup> | 1              |
| 24 | <i>USP32</i>         | 17         | 0.2668435      | 0.030825697 | < 10 <sup>-6</sup> | 1              |
| 25 | <i>NF1</i>           | 17         | 0.2650127      | 0.446732585 | < 10 <sup>-6</sup> | 2              |
| 26 | <i>RP11-53O19.1</i>  | 5          | 0.2645393      | 0.266671012 | < 10 <sup>-6</sup> | 2              |
| 27 | <i>HDAC1</i>         | 1          | 0.2631774      | 0.038364271 | < 10 <sup>-6</sup> | 1              |
| 28 | <i>ABCB1</i>         | 7          | 0.2624699      | 0.032952008 | < 10 <sup>-6</sup> | 1              |
| 29 | <i>RUNDC3B</i>       | 7          | 0.2624699      | 0.032952008 | < 10 <sup>-6</sup> | 1              |
| 30 | <i>ADK</i>           | 10         | 0.2592457      | 0.395106884 | < 10 <sup>-6</sup> | 2              |
| 31 | <i>CNNM4</i>         | 2          | 0.2583070      | 0.084782739 | < 10 <sup>-6</sup> | 1              |
| 32 | <i>DDB1</i>          | 11         | 0.2571627      | 0.012680739 | < 10 <sup>-6</sup> | 1              |
| 33 | <i>XXYL1</i>         | 3          | 0.2563662      | 0.022777439 | < 10 <sup>-6</sup> | 1              |
| 34 | <i>COMMD3-BMI1</i>   | 10         | 0.2549803      | 0.029266377 | < 10 <sup>-6</sup> | 1              |
| 35 | <i>BMI1</i>          | 10         | 0.2549803      | 0.029266377 | < 10 <sup>-6</sup> | 1              |
| 36 | <i>PRKAR2A</i>       | 3          | 0.2543194      | 0.029957868 | < 10 <sup>-6</sup> | 1              |
| 37 | <i>USP25</i>         | 21         | 0.2500539      | 0.039729584 | < 10 <sup>-6</sup> | 1              |
| 38 | <i>ATP6V0D1</i>      | 16         | 0.2497646      | 0.015632539 | < 10 <sup>-6</sup> | 1              |
| 39 | <i>GPC5</i>          | 13         | 0.2484834      | 0.088347003 | < 10 <sup>-6</sup> | 1              |
| 40 | <i>SPATA31D3</i>     | 9          | 0.2473412      | 0.031572111 | < 10 <sup>-6</sup> | 1              |

Table S10: Top 40 SS-H12 sweep candidates at RNA- and protein-coding genes shared between the East Asian JPT and Southeast Asian KHV populations. Candidates presented are those that remained after application of a mappability and alignability filter to data (see *Materials and Methods*). Target genes that pass the significance threshold are colored in gold in the “*P*-value” column. Genes whose sweeps are assigned as hard ( $\nu = 1$ ) are shaded in red in the “Inferred  $\nu$ ” column, while soft sweeps ( $\nu \geq 2$ ) are colored in blue.

|    | Top gene             | Chromosome | Maximum SS-H12 | H2/H1       | <i>P</i> -value      | Inferred $\nu$ |
|----|----------------------|------------|----------------|-------------|----------------------|----------------|
| 1  | <i>EXOC6B</i>        | 2          | 0.5264721      | 0.006772899 | < $10^{-6}$          | 1              |
| 2  | <i>SPAG6</i>         | 10         | 0.4968819      | 0.006607293 | < $10^{-6}$          | 1              |
| 3  | <i>P4HTM</i>         | 3          | 0.4842239      | 0.003800968 | < $10^{-6}$          | 1              |
| 4  | <i>RUNX1T1</i>       | 8          | 0.4762151      | 0.012305665 | < $10^{-6}$          | 1              |
| 5  | <i>C11orf49</i>      | 11         | 0.4727695      | 0.068502981 | < $10^{-6}$          | 1              |
| 6  | <i>RP11-696N14.1</i> | 4          | 0.4622633      | 0.047157537 | < $10^{-6}$          | 1              |
| 7  | <i>EXD2</i>          | 14         | 0.4488191      | 0.012119385 | < $10^{-6}$          | 1              |
| 8  | <i>BCL2L1</i>        | 20         | 0.4334603      | 0.011505081 | $1.0 \times 10^{-6}$ | 1              |
| 9  | <i>SPIDR</i>         | 8          | 0.4323823      | 0.121946971 | $1.0 \times 10^{-6}$ | 2              |
| 10 | <i>TMEM33</i>        | 4          | 0.4163834      | 0.013441981 | $1.0 \times 10^{-6}$ | 1              |
| 11 | <i>HMCN1</i>         | 1          | 0.4139426      | 0.433746297 | $1.0 \times 10^{-6}$ | 2              |
| 12 | <i>TRMT11</i>        | 6          | 0.4132626      | 0.008565410 | $1.0 \times 10^{-6}$ | 1              |
| 13 | <i>CSPP1</i>         | 8          | 0.4131015      | 0.370451157 | $1.0 \times 10^{-6}$ | 2              |
| 14 | <i>BCL7C</i>         | 16         | 0.4116698      | 0.017374975 | $1.0 \times 10^{-6}$ | 1              |
| 15 | <i>AMBRA1</i>        | 11         | 0.4078245      | 0.026064925 | $3.0 \times 10^{-6}$ | 1              |
| 16 | <i>ADH1A</i>         | 4          | 0.4068527      | 0.054411554 | $3.0 \times 10^{-6}$ | 1              |
| 17 | <i>LINC00536</i>     | 8          | 0.4047586      | 0.319893205 | $4.0 \times 10^{-6}$ | 2              |
| 18 | <i>TRUB1</i>         | 10         | 0.3960872      | 0.012888666 | $8.0 \times 10^{-6}$ | 1              |
| 19 | <i>SLC25A20</i>      | 3          | 0.3951800      | 0.306872504 | $1.0 \times 10^{-5}$ | 2              |
| 20 | <i>NOVA1</i>         | 14         | 0.3937128      | 0.296371985 | $1.1 \times 10^{-5}$ | 2              |
| 21 | <i>UBE3A</i>         | 15         | 0.3881960      | 0.421256404 | $1.3 \times 10^{-5}$ | 2              |
| 22 | <i>RAD51B</i>        | 14         | 0.3877928      | 0.020655194 | $1.3 \times 10^{-5}$ | 1              |
| 23 | <i>C2orf66</i>       | 2          | 0.3847481      | 0.011183304 | $1.4 \times 10^{-5}$ | 1              |
| 24 | <i>ARIH2</i>         | 3          | 0.3835818      | 0.011305712 | $1.5 \times 10^{-5}$ | 1              |
| 25 | <i>FBXO4</i>         | 5          | 0.3830810      | 0.060543858 | $1.5 \times 10^{-5}$ | 1              |
| 26 | <i>PURA</i>          | 5          | 0.3821055      | 0.043743931 | $1.5 \times 10^{-5}$ | 1              |
| 27 | <i>LOC100188947</i>  | 10         | 0.3819967      | 0.126665136 | $1.5 \times 10^{-5}$ | 2              |
| 28 | <i>HECTD2</i>        | 10         | 0.3819967      | 0.126665136 | $1.5 \times 10^{-5}$ | 2              |
| 29 | <i>ZNF282</i>        | 7          | 0.3789665      | 0.013728048 | $1.5 \times 10^{-5}$ | 1              |
| 30 | <i>SPATS2</i>        | 12         | 0.3779965      | 0.018103713 | $1.7 \times 10^{-5}$ | 1              |
| 31 | <i>DPH6</i>          | 15         | 0.3765334      | 0.016983232 | $1.7 \times 10^{-5}$ | 1              |
| 32 | <i>ARIH2OS</i>       | 3          | 0.3750646      | 0.011348289 | $1.9 \times 10^{-5}$ | 1              |
| 33 | <i>KCNT2</i>         | 1          | 0.3748550      | 0.093205290 | $1.9 \times 10^{-5}$ | 1              |
| 34 | <i>GPHN</i>          | 14         | 0.3744098      | 0.478385232 | $1.9 \times 10^{-5}$ | 2              |
| 35 | <i>PHYHIPL</i>       | 10         | 0.3737335      | 0.020357412 | $2.2 \times 10^{-5}$ | 1              |
| 36 | <i>CCDC18</i>        | 1          | 0.3732415      | 0.124636275 | $2.2 \times 10^{-5}$ | 2              |
| 37 | <i>ABHD17B</i>       | 9          | 0.3730153      | 0.059902525 | $2.2 \times 10^{-5}$ | 1              |
| 38 | <i>IFT81</i>         | 12         | 0.3714945      | 0.220865456 | $2.2 \times 10^{-5}$ | 2              |
| 39 | <i>FHOD1</i>         | 16         | 0.3711776      | 0.013442943 | $2.2 \times 10^{-5}$ | 1              |
| 40 | <i>SYNJ1</i>         | 21         | 0.3678745      | 0.211024411 | $2.5 \times 10^{-5}$ | 2              |

Table S11: Top 40 SS-G123 sweep candidates at RNA- and protein-coding genes shared between the Central and Western European CEU and GBR populations. Candidates presented are those that remained after application of a mappability and alignability filter to data (see *Materials and Methods*). Target genes that pass the significance threshold are colored in gold in the “*P*-value” column. Genes whose sweeps are assigned as hard ( $\nu = 1$ ) are shaded in red in the “Inferred  $\nu$ ” column, while soft sweeps ( $\nu \geq 2$ ) are colored in blue.

|    | Top gene     | Chromosome | Maximum SS-G123 | G2/G1      | <i>P</i> -value       | Inferred $\nu$ |
|----|--------------|------------|-----------------|------------|-----------------------|----------------|
| 1  | ZRANB3       | 2          | 0.4036658       | 0.01992548 | 2.0×10 <sup>-6</sup>  | 1              |
| 2  | R3HDM1       | 2          | 0.4001688       | 0.03074343 | 3.0×10 <sup>-6</sup>  | 1              |
| 3  | DARS         | 2          | 0.3939288       | 0.04113419 | 4.0×10 <sup>-6</sup>  | 1              |
| 4  | SLC12A1      | 15         | 0.3494603       | 0.03411498 | 1.2×10 <sup>-5</sup>  | 1              |
| 5  | MCM6         | 2          | 0.3425388       | 0.04473161 | 1.8×10 <sup>-5</sup>  | 1              |
| 6  | AC093391.2   | 2          | 0.2944935       | 0.04039653 | 8.0×10 <sup>-5</sup>  | 1              |
| 7  | LCT          | 2          | 0.2864912       | 0.02114967 | 1.00×10 <sup>-4</sup> | 1              |
| 8  | UBXN4        | 2          | 0.2740023       | 0.02600907 | 1.47×10 <sup>-4</sup> | 1              |
| 9  | LOC100507600 | 2          | 0.2706452       | 0.02798382 | 1.68×10 <sup>-4</sup> | 1              |
| 10 | RAB3GAP1     | 2          | 0.2506534       | 0.06432749 | 3.48×10 <sup>-4</sup> | 1              |
| 11 | KMT2A        | 11         | 0.2041324       | 0.10449343 | 1.73×10 <sup>-3</sup> | 1              |
| 12 | BCAS3        | 17         | 0.1859900       | 0.09758002 | 3.05×10 <sup>-3</sup> | 1              |
| 13 | PPM1D        | 17         | 0.1800870       | 0.07265290 | 3.63×10 <sup>-3</sup> | 1              |
| 14 | UNC5D        | 8          | 0.1780280       | 0.39270231 | 3.86×10 <sup>-3</sup> | 3              |
| 15 | KAT6B        | 10         | 0.1707262       | 0.05624037 | 4.80×10 <sup>-3</sup> | 1              |
| 16 | TMEM116      | 12         | 0.1651175       | 0.18743961 | 5.66×10 <sup>-3</sup> | 1              |
| 17 | PRKDC        | 8          | 0.1628838       | 0.14634787 | 6.00×10 <sup>-3</sup> | 1              |
| 18 | MYO9A        | 15         | 0.1598302       | 0.06094675 | 6.56×10 <sup>-3</sup> | 1              |
| 19 | ACMSD        | 2          | 0.1572425       | 0.15455562 | 7.09×10 <sup>-3</sup> | 1              |
| 20 | CCNT2-AS1    | 2          | 0.1572425       | 0.15455562 | 7.09×10 <sup>-3</sup> | 1              |
| 21 | ZNF546       | 19         | 0.1563353       | 0.28800989 | 7.27×10 <sup>-3</sup> | 2              |
| 22 | C4orf22      | 4          | 0.1548723       | 0.17300057 | 7.57×10 <sup>-3</sup> | 1              |
| 23 | COL5A2       | 2          | 0.1531146       | 0.07664563 | 7.97×10 <sup>-3</sup> | 1              |
| 24 | KITLG        | 12         | 0.1507429       | 0.09976581 | 8.55×10 <sup>-3</sup> | 1              |
| 25 | MRPS31       | 13         | 0.1404181       | 0.66863672 | 1.17×10 <sup>-2</sup> | 6              |
| 26 | LAMA3        | 18         | 0.1397230       | 0.41137771 | 1.19×10 <sup>-2</sup> | 3              |
| 27 | AGO3         | 1          | 0.1389525       | 0.18726491 | 1.22×10 <sup>-2</sup> | 1              |
| 28 | RALGAPA1     | 14         | 0.1372367       | 0.10397132 | 1.28×10 <sup>-2</sup> | 1              |
| 29 | RALGAPA1P    | 14         | 0.1372367       | 0.10397132 | 1.28×10 <sup>-2</sup> | 1              |
| 30 | SYT1         | 12         | 0.1368878       | 0.18617021 | 1.29×10 <sup>-2</sup> | 1              |
| 31 | GFRA2        | 8          | 0.1354658       | 0.51413190 | 1.35×10 <sup>-2</sup> | 4              |
| 32 | CNBD2        | 20         | 0.1345655       | 0.10348771 | 1.39×10 <sup>-2</sup> | 1              |
| 33 | PIK3R4       | 3          | 0.1315715       | 0.31331699 | 1.51×10 <sup>-2</sup> | 2              |
| 34 | CDK6         | 7          | 0.1302599       | 0.19966667 | 1.57×10 <sup>-2</sup> | 1              |
| 35 | DIRC3        | 2          | 0.1301000       | 0.13940724 | 1.58×10 <sup>-2</sup> | 1              |
| 36 | GNA14        | 9          | 0.1297811       | 0.11111111 | 1.59×10 <sup>-2</sup> | 1              |
| 37 | EXOC5        | 14         | 0.1292055       | 0.27603759 | 1.62×10 <sup>-2</sup> | 1              |
| 38 | SPATA5L1     | 15         | 0.1291950       | 0.50091659 | 1.62×10 <sup>-2</sup> | 4              |
| 39 | AC005592.1   | 5          | 0.1283393       | 0.05882353 | 1.66×10 <sup>-2</sup> | 1              |
| 40 | TMEM163      | 2          | 0.1271473       | 0.27047556 | 1.72×10 <sup>-2</sup> | 1              |

Table S12: Top 40 SS-G123 sweep candidates at RNA- and protein-coding genes shared between the Western European CEU and South Asian GIH populations. Candidates presented are those that remained after application of a mappability and alignability filter to data (see *Materials and Methods*). Target genes that pass the significance threshold are colored in gold in the “*P*-value” column. Genes whose sweeps are assigned as hard ( $\nu = 1$ ) are shaded in red in the “Inferred  $\nu$ ” column, while soft sweeps ( $\nu \geq 2$ ) are colored in blue.

|    | Top gene     | Chromosome | Maximum SS-G123 | G2/G1      | <i>P</i> -value      | Inferred $\nu$ |
|----|--------------|------------|-----------------|------------|----------------------|----------------|
| 1  | SLC12A1      | 15         | 0.24849898      | 0.07039983 | < 10 <sup>-6</sup>   | 1              |
| 2  | RUNX1T1      | 8          | 0.16146633      | 0.14275121 | < 10 <sup>-6</sup>   | 1              |
| 3  | ZNF546       | 19         | 0.13139163      | 0.31590106 | < 10 <sup>-6</sup>   | 2              |
| 4  | RNU6-28P     | 15         | 0.12412153      | 0.49297753 | < 10 <sup>-6</sup>   | 2              |
| 5  | PPIP5K1      | 15         | 0.12412153      | 0.49297753 | < 10 <sup>-6</sup>   | 2              |
| 6  | PRMT9        | 4          | 0.12362840      | 0.12395833 | < 10 <sup>-6</sup>   | 1              |
| 7  | BCAS3        | 17         | 0.12155652      | 0.05834652 | < 10 <sup>-6</sup>   | 1              |
| 8  | HDAC1        | 1          | 0.11263346      | 0.10144553 | < 10 <sup>-6</sup>   | 1              |
| 9  | P4HA1        | 10         | 0.10999698      | 0.16650149 | 1.0×10 <sup>-6</sup> | 1              |
| 10 | PITPNB       | 22         | 0.10563578      | 0.35822785 | 1.0×10 <sup>-6</sup> | 2              |
| 11 | CUX2         | 12         | 0.10209057      | 0.06924939 | 2.0×10 <sup>-6</sup> | 1              |
| 12 | NECAB1       | 8          | 0.10197638      | 0.25569620 | 2.0×10 <sup>-6</sup> | 1              |
| 13 | HS2ST1       | 1          | 0.10041528      | 0.10199005 | 2.0×10 <sup>-6</sup> | 1              |
| 14 | METTL25      | 12         | 0.09952687      | 0.08587185 | 2.0×10 <sup>-6</sup> | 1              |
| 15 | CELSR3       | 3          | 0.09761571      | 0.12500000 | 2.0×10 <sup>-6</sup> | 1              |
| 16 | KCNQ5        | 6          | 0.09516938      | 0.08284819 | 2.0×10 <sup>-6</sup> | 1              |
| 17 | USP25        | 21         | 0.09485193      | 0.11653037 | 2.0×10 <sup>-6</sup> | 1              |
| 18 | OSBPL9       | 1          | 0.09477321      | 0.16461204 | 2.0×10 <sup>-6</sup> | 1              |
| 19 | PPM1D        | 17         | 0.09457751      | 0.08187773 | 2.0×10 <sup>-6</sup> | 1              |
| 20 | PSMB2        | 1          | 0.09368669      | 0.10872127 | 2.0×10 <sup>-6</sup> | 1              |
| 21 | KITLG        | 12         | 0.09321913      | 0.10938491 | 2.0×10 <sup>-6</sup> | 1              |
| 22 | PTPRK        | 6          | 0.09238986      | 0.15235110 | 2.0×10 <sup>-6</sup> | 1              |
| 23 | PRPF40B      | 12         | 0.08811411      | 0.10312899 | 2.0×10 <sup>-6</sup> | 1              |
| 24 | EXOC5        | 14         | 0.08680119      | 0.14383562 | 2.0×10 <sup>-6</sup> | 1              |
| 25 | NF1          | 17         | 0.08654684      | 0.53987730 | 2.0×10 <sup>-6</sup> | 2              |
| 26 | KIAA0825     | 5          | 0.08651185      | 0.13956568 | 2.0×10 <sup>-6</sup> | 1              |
| 27 | KLHL28       | 14         | 0.08623216      | 0.08287895 | 3.0×10 <sup>-6</sup> | 1              |
| 28 | UNC5D        | 8          | 0.08584013      | 0.23278008 | 4.0×10 <sup>-6</sup> | 1              |
| 29 | C8orf44-SGK3 | 8          | 0.08500952      | 0.10876730 | 4.0×10 <sup>-6</sup> | 1              |
| 30 | SGK3         | 8          | 0.08500952      | 0.10876730 | 4.0×10 <sup>-6</sup> | 1              |
| 31 | GNA14        | 9          | 0.08464131      | 0.20441989 | 4.0×10 <sup>-6</sup> | 1              |
| 32 | POLN         | 4          | 0.08228096      | 0.25619469 | 4.0×10 <sup>-6</sup> | 1              |
| 33 | FMNL3        | 12         | 0.08227142      | 0.09967949 | 4.0×10 <sup>-6</sup> | 1              |
| 34 | IFT80        | 3          | 0.08224157      | 0.65133172 | 4.0×10 <sup>-6</sup> | 4              |
| 35 | TFAP2E       | 1          | 0.08005606      | 0.45766932 | 6.0×10 <sup>-6</sup> | 2              |
| 36 | KIAA0947     | 5          | 0.08003881      | 0.33080329 | 6.0×10 <sup>-6</sup> | 1              |
| 37 | LINC00478    | 21         | 0.07852482      | 0.16499666 | 6.0×10 <sup>-6</sup> | 1              |
| 38 | EXOC6B       | 2          | 0.07730652      | 0.14328063 | 6.0×10 <sup>-6</sup> | 1              |
| 39 | FAM149B1     | 10         | 0.07630036      | 0.14383562 | 6.0×10 <sup>-6</sup> | 1              |
| 40 | CCDC178      | 18         | 0.07628428      | 0.33479106 | 6.0×10 <sup>-6</sup> | 1              |

Table S13: Top 40 SS-G123 sweep candidates at RNA- and protein-coding genes shared between the Western European CEU and East Asian JPT populations. Candidates presented are those that remained after application of a mappability and alignability filter to data (see *Materials and Methods*). Target genes that pass the significance threshold are colored in gold in the “*P*-value” column. Genes whose sweeps are assigned as hard ( $\nu = 1$ ) are shaded in red in the “Inferred  $\nu$ ” column, while soft sweeps ( $\nu \geq 2$ ) are colored in blue.

|    | Top gene            | Chromosome | Maximum SS-G123 | G2/G1      | <i>P</i> -value      | Inferred $\nu$ |
|----|---------------------|------------|-----------------|------------|----------------------|----------------|
| 1  | <i>SPIDR</i>        | 8          | 0.19359701      | 0.31787351 | < 10 <sup>-6</sup>   | 3              |
| 2  | <i>RUNX1T1</i>      | 8          | 0.11275519      | 0.05393330 | < 10 <sup>-6</sup>   | 1              |
| 3  | <i>MRAP2</i>        | 6          | 0.11102258      | 0.25897350 | < 10 <sup>-6</sup>   | 1              |
| 4  | <i>BVES-AS1</i>     | 6          | 0.10952935      | 0.51920530 | < 10 <sup>-6</sup>   | 2              |
| 5  | <i>LINC00478</i>    | 21         | 0.10122097      | 0.27387331 | < 10 <sup>-6</sup>   | 1              |
| 6  | <i>USP25</i>        | 21         | 0.09815414      | 0.14385858 | < 10 <sup>-6</sup>   | 1              |
| 7  | <i>BCAS3</i>        | 17         | 0.09127146      | 0.06342583 | < 10 <sup>-6</sup>   | 1              |
| 8  | <i>DNAH6</i>        | 2          | 0.08296677      | 0.20867526 | < 10 <sup>-6</sup>   | 1              |
| 9  | <i>BEND4</i>        | 4          | 0.08124753      | 0.09624478 | < 10 <sup>-6</sup>   | 1              |
| 10 | <i>ZNF546</i>       | 19         | 0.07817327      | 0.06845577 | 2.0×10 <sup>-6</sup> | 1              |
| 11 | <i>HDAC1</i>        | 1          | 0.07768263      | 0.06808180 | 2.0×10 <sup>-6</sup> | 1              |
| 12 | <i>DENND1A</i>      | 9          | 0.07496250      | 0.22050376 | 2.0×10 <sup>-6</sup> | 1              |
| 13 | <i>ZRANB3</i>       | 2          | -0.07278140     | 0.49384359 | 2.0×10 <sup>-6</sup> | 2              |
| 14 | <i>C16orf70</i>     | 16         | 0.07075091      | 0.43935927 | 3.0×10 <sup>-6</sup> | 1              |
| 15 | <i>EXOC6B</i>       | 2          | 0.06885796      | 0.10195948 | 3.0×10 <sup>-6</sup> | 1              |
| 16 | <i>DIRC3</i>        | 2          | 0.06861035      | 0.13584514 | 3.0×10 <sup>-6</sup> | 1              |
| 17 | <i>C4orf22</i>      | 4          | 0.06847775      | 0.22222222 | 3.0×10 <sup>-6</sup> | 1              |
| 18 | <i>NR6A1</i>        | 9          | 0.06812268      | 0.55860716 | 4.0×10 <sup>-6</sup> | 2              |
| 19 | <i>LRRC29</i>       | 16         | 0.06519534      | 0.13352580 | 6.0×10 <sup>-6</sup> | 1              |
| 20 | <i>TMEM116</i>      | 12         | -0.06340056     | 0.44410413 | 6.0×10 <sup>-6</sup> | 1              |
| 21 | <i>C2CD5</i>        | 12         | -0.06292884     | 0.36420361 | 6.0×10 <sup>-6</sup> | 1              |
| 22 | <i>PRKDC</i>        | 8          | 0.06144151      | 0.09442680 | 7.0×10 <sup>-6</sup> | 1              |
| 23 | <i>PRPF40B</i>      | 12         | 0.05952341      | 0.09292184 | 8.0×10 <sup>-6</sup> | 1              |
| 24 | <i>CELSR3</i>       | 3          | 0.05950715      | 0.15054195 | 8.0×10 <sup>-6</sup> | 1              |
| 25 | <i>MTOR</i>         | 1          | 0.05841437      | 0.34873239 | 1.1×10 <sup>-5</sup> | 1              |
| 26 | <i>ANGPTL7</i>      | 1          | 0.05841437      | 0.34873239 | 1.1×10 <sup>-5</sup> | 1              |
| 27 | <i>KIAA1324L</i>    | 7          | 0.05770516      | 0.16563659 | 1.1×10 <sup>-5</sup> | 1              |
| 28 | <i>EPB41L1</i>      | 20         | 0.05760458      | 0.24740228 | 1.1×10 <sup>-5</sup> | 1              |
| 29 | <i>EPS8</i>         | 12         | 0.05647792      | 0.23065250 | 1.4×10 <sup>-5</sup> | 1              |
| 30 | <i>LOC100188947</i> | 10         | 0.05452677      | 0.26400000 | 1.8×10 <sup>-5</sup> | 1              |
| 31 | <i>HECTD2</i>       | 10         | 0.05452677      | 0.26400000 | 1.8×10 <sup>-5</sup> | 1              |
| 32 | <i>R3HDM1</i>       | 2          | -0.05448265     | 0.31076443 | 1.8×10 <sup>-5</sup> | 1              |
| 33 | <i>ZNF106</i>       | 15         | 0.05420983      | 0.10975158 | 1.9×10 <sup>-5</sup> | 1              |
| 34 | <i>C8orf44-SGK3</i> | 8          | 0.05260365      | 0.54661301 | 2.2×10 <sup>-5</sup> | 2              |
| 35 | <i>SGK3</i>         | 8          | 0.05260365      | 0.54661301 | 2.2×10 <sup>-5</sup> | 2              |
| 36 | <i>CCBL2</i>        | 1          | 0.05220339      | 0.37208039 | 2.3×10 <sup>-5</sup> | 1              |
| 37 | <i>LYRM7</i>        | 5          | 0.05213381      | 0.12161647 | 2.4×10 <sup>-5</sup> | 1              |
| 38 | <i>C5orf42</i>      | 5          | 0.05108960      | 0.57542225 | 2.7×10 <sup>-5</sup> | 2              |
| 39 | <i>RCBTB2</i>       | 13         | 0.05067259      | 0.52998066 | 2.8×10 <sup>-5</sup> | 2              |
| 40 | <i>ARL13B</i>       | 3          | 0.05000593      | 0.54782609 | 3.3×10 <sup>-5</sup> | 2              |

Table S14: Top 40 SS-G123 sweep candidates at RNA- and protein-coding genes shared between the Central European CEU and West African YRI populations. Candidates presented are those that remained after application of a mappability and alignability filter to data (see *Materials and Methods*). Target genes that pass the significance threshold are colored in gold in the “*P*-value” column. Genes whose sweeps are assigned as hard ( $\nu = 1$ ) are shaded in red in the “Inferred  $\nu$ ” column, while soft sweeps ( $\nu \geq 2$ ) are colored in blue.

|    | Top gene      | Chromosome | Maximum SS-G123 | G2/G1      | <i>P</i> -value       | Inferred $\nu$ |
|----|---------------|------------|-----------------|------------|-----------------------|----------------|
| 1  | KIAA0825      | 5          | 0.16262192      | 0.09800692 | 2.0×10 <sup>-6</sup>  | 1              |
| 2  | RP11-554F20.1 | 9          | 0.14328641      | 0.07170707 | 3.0×10 <sup>-6</sup>  | 1              |
| 3  | SPRED3        | 19         | 0.13648875      | 0.04008778 | 3.0×10 <sup>-6</sup>  | 1              |
| 4  | CASC4         | 15         | 0.13642990      | 0.06088150 | 3.0×10 <sup>-6</sup>  | 1              |
| 5  | DEDD          | 1          | 0.12323306      | 0.19270458 | 6.0×10 <sup>-6</sup>  | 1              |
| 6  | GSTT1         | 22         | 0.11632223      | 0.07518328 | 7.0×10 <sup>-6</sup>  | 1              |
| 7  | ENTHD1        | 22         | 0.11574899      | 0.29510665 | 7.0×10 <sup>-6</sup>  | 1              |
| 8  | NNT           | 5          | 0.11500267      | 0.09709843 | 8.0×10 <sup>-6</sup>  | 1              |
| 9  | ATP6V1A       | 3          | 0.11487292      | 0.46656145 | 9.0×10 <sup>-6</sup>  | 1              |
| 10 | DANCR         | 4          | 0.10908564      | 0.16342225 | 1.1×10 <sup>-5</sup>  | 1              |
| 11 | MIR548H3      | 6          | 0.10678068      | 0.11806435 | 1.5×10 <sup>-5</sup>  | 1              |
| 12 | GRIA2         | 4          | 0.10578392      | 0.36923077 | 1.7×10 <sup>-5</sup>  | 1              |
| 13 | GRIK5         | 19         | 0.10082463      | 0.14846599 | 1.9×10 <sup>-5</sup>  | 1              |
| 14 | TYW5          | 2          | 0.10050784      | 0.52092831 | 1.9×10 <sup>-5</sup>  | 1              |
| 15 | PIGV          | 1          | 0.09740419      | 0.10112360 | 2.3×10 <sup>-5</sup>  | 1              |
| 16 | RALGAPA2      | 20         | 0.09590598      | 0.09440637 | 2.7×10 <sup>-5</sup>  | 1              |
| 17 | PLEKHA8       | 7          | 0.09390530      | 0.29760666 | 3.3×10 <sup>-5</sup>  | 1              |
| 18 | GLRX2         | 1          | 0.09374561      | 0.53420670 | 3.3×10 <sup>-5</sup>  | 1              |
| 19 | PAWR          | 12         | -0.09282636     | 0.41657077 | 3.4×10 <sup>-5</sup>  | 1              |
| 20 | PHKB          | 16         | 0.09044005      | 0.10755993 | 3.6×10 <sup>-5</sup>  | 1              |
| 21 | ERLIN2        | 8          | 0.08847504      | 0.09065880 | 3.9×10 <sup>-5</sup>  | 1              |
| 22 | SPG11         | 15         | 0.08398508      | 0.14916585 | 5.5×10 <sup>-5</sup>  | 1              |
| 23 | RRN3P3        | 16         | -0.08384446     | 0.67088036 | 5.6×10 <sup>-5</sup>  | 8              |
| 24 | DKK2          | 4          | 0.08252351      | 0.13276618 | 6.1×10 <sup>-5</sup>  | 1              |
| 25 | ABHD17B       | 9          | 0.08249391      | 0.08387291 | 6.1×10 <sup>-5</sup>  | 1              |
| 26 | CNNM2         | 10         | 0.08094510      | 0.15631825 | 6.4×10 <sup>-5</sup>  | 1              |
| 27 | TGFBR1        | 9          | 0.07873090      | 0.42549372 | 7.4×10 <sup>-5</sup>  | 1              |
| 28 | CPNE1         | 20         | 0.07384179      | 0.19304797 | 1.03×10 <sup>-4</sup> | 1              |
| 29 | PRKAR2A       | 3          | 0.07271481      | 0.59669161 | 1.14×10 <sup>-4</sup> | 2              |
| 30 | NLK           | 17         | 0.07079549      | 0.24630342 | 1.30×10 <sup>-4</sup> | 1              |
| 31 | CDK6          | 7          | 0.07054583      | 0.07748561 | 1.32×10 <sup>-4</sup> | 1              |
| 32 | SYT1          | 12         | 0.06986742      | 0.27157762 | 1.38×10 <sup>-4</sup> | 1              |
| 33 | GABRA4        | 4          | 0.06971220      | 0.52556668 | 1.38×10 <sup>-4</sup> | 1              |
| 34 | ZNF451        | 6          | 0.06885744      | 0.19779485 | 1.46×10 <sup>-4</sup> | 1              |
| 35 | ITFG1         | 16         | 0.06882713      | 0.16926617 | 1.46×10 <sup>-4</sup> | 1              |
| 36 | FRYL          | 4          | 0.06828603      | 0.56018307 | 1.52×10 <sup>-4</sup> | 2              |
| 37 | EXOC6B        | 2          | -0.06782534     | 0.46576537 | 1.62×10 <sup>-4</sup> | 1              |
| 38 | USP46         | 4          | 0.06639854      | 0.25667307 | 1.75×10 <sup>-4</sup> | 1              |
| 39 | LGSN          | 6          | 0.06638067      | 0.19928826 | 1.76×10 <sup>-4</sup> | 1              |
| 40 | ATF2          | 2          | 0.06592706      | 0.26808614 | 1.83×10 <sup>-4</sup> | 1              |

Table S15: Top 40 SS-G123 sweep candidates at RNA- and protein-coding genes shared between the East African LWK and West African YRI populations. Candidates presented are those that remained after application of a mappability and alignability filter to data (see *Materials and Methods*). Target genes that pass the significance threshold are colored in gold in the “*P*-value” column. Genes whose sweeps are assigned as hard ( $\nu = 1$ ) are shaded in red in the “Inferred  $\nu$ ” column, while soft sweeps ( $\nu \geq 2$ ) are colored in blue.

|    | Top gene             | Chromosome | Maximum SS-G123 | G2/G1      | <i>P</i> -value    | Inferred $\nu$ |
|----|----------------------|------------|-----------------|------------|--------------------|----------------|
| 1  | <i>GRIK5</i>         | 19         | 0.2415148       | 0.12482020 | < 10 <sup>-6</sup> | 1              |
| 2  | <i>GSTT1</i>         | 22         | 0.2247992       | 0.23472029 | < 10 <sup>-6</sup> | 3              |
| 3  | <i>RP11-554F20.1</i> | 9          | 0.2067291       | 0.10210615 | < 10 <sup>-6</sup> | 1              |
| 4  | <i>KIAA0825</i>      | 5          | 0.2003773       | 0.29785697 | < 10 <sup>-6</sup> | 2              |
| 5  | <i>RGS18</i>         | 1          | 0.1739911       | 0.21109123 | < 10 <sup>-6</sup> | 2              |
| 6  | <i>RRN3P3</i>        | 16         | 0.1675603       | 0.40424178 | < 10 <sup>-6</sup> | 2              |
| 7  | <i>PPAPDC1B</i>      | 8          | 0.1654046       | 0.11850615 | < 10 <sup>-6</sup> | 1              |
| 8  | <i>SPRED3</i>        | 19         | 0.1609167       | 0.05899437 | < 10 <sup>-6</sup> | 1              |
| 9  | <i>NNT</i>           | 5          | 0.1564619       | 0.09173050 | < 10 <sup>-6</sup> | 1              |
| 10 | <i>ARID1A</i>        | 1          | 0.1540840       | 0.14330287 | < 10 <sup>-6</sup> | 1              |
| 11 | <i>CASC4</i>         | 15         | 0.1429575       | 0.05820969 | < 10 <sup>-6</sup> | 1              |
| 12 | <i>EHBP1</i>         | 2          | 0.1429198       | 0.17335159 | < 10 <sup>-6</sup> | 1              |
| 13 | <i>ATF2</i>          | 2          | 0.1396078       | 0.54310604 | < 10 <sup>-6</sup> | 2              |
| 14 | <i>DKK2</i>          | 4          | 0.1378883       | 0.12261259 | < 10 <sup>-6</sup> | 1              |
| 15 | <i>MIR548AE2</i>     | 16         | 0.1372927       | 0.09054441 | < 10 <sup>-6</sup> | 1              |
| 16 | <i>LONP2</i>         | 16         | 0.1372927       | 0.09054441 | < 10 <sup>-6</sup> | 1              |
| 17 | <i>DDHD2</i>         | 8          | 0.1343500       | 0.11662586 | < 10 <sup>-6</sup> | 1              |
| 18 | <i>PHKB</i>          | 16         | 0.1315935       | 0.39985719 | < 10 <sup>-6</sup> | 2              |
| 19 | <i>FER1L6</i>        | 8          | 0.1274631       | 0.42668677 | < 10 <sup>-6</sup> | 2              |
| 20 | <i>FER1L6-AS1</i>    | 8          | 0.1274631       | 0.42668677 | < 10 <sup>-6</sup> | 2              |
| 21 | <i>SPIDR</i>         | 8          | 0.1269844       | 0.47826087 | < 10 <sup>-6</sup> | 2              |
| 22 | <i>GRIA4</i>         | 11         | 0.1268945       | 0.16182811 | < 10 <sup>-6</sup> | 1              |
| 23 | <i>DANCR</i>         | 4          | 0.1260421       | 0.15609221 | < 10 <sup>-6</sup> | 1              |
| 24 | <i>TCF4</i>          | 18         | 0.1243683       | 0.20357244 | < 10 <sup>-6</sup> | 1              |
| 25 | <i>PIGV</i>          | 1          | 0.1237784       | 0.09449782 | < 10 <sup>-6</sup> | 1              |
| 26 | <i>RALGAPA2</i>      | 20         | 0.1233941       | 0.09403724 | < 10 <sup>-6</sup> | 1              |
| 27 | <i>TMC1</i>          | 9          | 0.1218435       | 0.28051683 | < 10 <sup>-6</sup> | 1              |
| 28 | <i>PSMD14</i>        | 2          | 0.1205903       | 0.43648469 | < 10 <sup>-6</sup> | 2              |
| 29 | <i>CNNM2</i>         | 10         | 0.1205598       | 0.13187097 | < 10 <sup>-6</sup> | 1              |
| 30 | <i>FAM172A</i>       | 5          | 0.1204877       | 0.46349206 | < 10 <sup>-6</sup> | 2              |
| 31 | <i>BRIP1</i>         | 17         | 0.1186024       | 0.25193076 | < 10 <sup>-6</sup> | 1              |
| 32 | <i>GSTTP2</i>        | 22         | 0.1184177       | 0.16994022 | < 10 <sup>-6</sup> | 1              |
| 33 | <i>MAGI3</i>         | 1          | 0.1173924       | 0.17789681 | < 10 <sup>-6</sup> | 1              |
| 34 | <i>METTL25</i>       | 12         | 0.1168971       | 0.23853844 | < 10 <sup>-6</sup> | 1              |
| 35 | <i>CCDC178</i>       | 18         | 0.1152967       | 0.27341227 | < 10 <sup>-6</sup> | 1              |
| 36 | <i>DDX19B</i>        | 16         | 0.1146779       | 0.23421127 | < 10 <sup>-6</sup> | 1              |
| 37 | <i>RBBP4</i>         | 1          | 0.1145007       | 0.63782696 | < 10 <sup>-6</sup> | 2              |
| 38 | <i>C10orf32-ASMT</i> | 10         | 0.1138325       | 0.38839475 | < 10 <sup>-6</sup> | 2              |
| 39 | <i>AS3MT</i>         | 10         | 0.1138325       | 0.38839475 | < 10 <sup>-6</sup> | 2              |
| 40 | <i>ZNF451</i>        | 6          | 0.1137655       | 0.21774436 | < 10 <sup>-6</sup> | 1              |

Table S16: Top 40 SS-G123 sweep candidates at RNA- and protein-coding genes shared between the South Asian GIH and West African YRI populations. Candidates presented are those that remained after application of a mappability and alignability filter to data (see *Materials and Methods*). Target genes that pass the significance threshold are colored in gold in the “*P*-value” column. Genes whose sweeps are assigned as hard ( $\nu = 1$ ) are shaded in red in the “Inferred  $\nu$ ” column, while soft sweeps ( $\nu \geq 2$ ) are colored in blue.

|    | Top gene      | Chromosome | Maximum SS-G123 | G2/G1      | <i>P</i> -value      | Inferred $\nu$ |
|----|---------------|------------|-----------------|------------|----------------------|----------------|
| 1  | CASC4         | 15         | 0.16711386      | 0.03621655 | < 10 <sup>-6</sup>   | 1              |
| 2  | NNT           | 5          | 0.14575420      | 0.04650487 | < 10 <sup>-6</sup>   | 1              |
| 3  | KIAA0825      | 5          | 0.14498089      | 0.07326733 | < 10 <sup>-6</sup>   | 1              |
| 4  | CDK6          | 7          | 0.13787179      | 0.23060483 | < 10 <sup>-6</sup>   | 1              |
| 5  | ATP6V1A       | 3          | 0.12981556      | 0.28721584 | < 10 <sup>-6</sup>   | 1              |
| 6  | DDHD2         | 8          | 0.12639095      | 0.06514875 | < 10 <sup>-6</sup>   | 1              |
| 7  | SYT1          | 12         | 0.12432490      | 0.04995287 | < 10 <sup>-6</sup>   | 1              |
| 8  | DEDD          | 1          | 0.12425622      | 0.15489439 | < 10 <sup>-6</sup>   | 1              |
| 9  | RP11-554F20.1 | 9          | 0.12160852      | 0.05718271 | < 10 <sup>-6</sup>   | 1              |
| 10 | PSMD14        | 2          | 0.11708713      | 0.43952713 | < 10 <sup>-6</sup>   | 1              |
| 11 | FBXW4         | 10         | 0.11552344      | 0.12795875 | < 10 <sup>-6</sup>   | 1              |
| 12 | PIGV          | 1          | 0.11324551      | 0.10666977 | < 10 <sup>-6</sup>   | 1              |
| 13 | MIR548AE2     | 16         | 0.10772443      | 0.11468505 | < 10 <sup>-6</sup>   | 1              |
| 14 | LONP2         | 16         | 0.10772443      | 0.11468505 | < 10 <sup>-6</sup>   | 1              |
| 15 | ABHD17B       | 9          | 0.10372984      | 0.05366309 | < 10 <sup>-6</sup>   | 1              |
| 16 | GRIK5         | 19         | 0.10341289      | 0.11576916 | < 10 <sup>-6</sup>   | 1              |
| 17 | PPAPDC1B      | 8          | 0.10317107      | 0.12980421 | < 10 <sup>-6</sup>   | 1              |
| 18 | C10orf76      | 10         | 0.10178019      | 0.51611553 | < 10 <sup>-6</sup>   | 1              |
| 19 | PLEKHA8       | 7          | 0.10177351      | 0.30315058 | < 10 <sup>-6</sup>   | 1              |
| 20 | PHKB          | 16         | 0.09939696      | 0.15921020 | < 10 <sup>-6</sup>   | 1              |
| 21 | RALGAPA2      | 20         | 0.09639928      | 0.13588492 | < 10 <sup>-6</sup>   | 1              |
| 22 | TULP4         | 6          | 0.09480228      | 0.14873493 | < 10 <sup>-6</sup>   | 1              |
| 23 | ERLIN2        | 8          | 0.09254210      | 0.13007499 | < 10 <sup>-6</sup>   | 1              |
| 24 | EXOC6B        | 2          | -0.09028512     | 0.55109110 | 1.0×10 <sup>-6</sup> | 2              |
| 25 | ZNF451        | 6          | 0.08854748      | 0.09354446 | 1.0×10 <sup>-6</sup> | 1              |
| 26 | CADM1         | 11         | 0.08766952      | 0.35196436 | 1.0×10 <sup>-6</sup> | 1              |
| 27 | COL7A1        | 3          | 0.08603112      | 0.12098249 | 1.0×10 <sup>-6</sup> | 1              |
| 28 | PAWR          | 12         | -0.08580547     | 0.44387569 | 1.0×10 <sup>-6</sup> | 1              |
| 29 | CAMK2G        | 10         | 0.08306775      | 0.43884563 | 2.0×10 <sup>-6</sup> | 1              |
| 30 | FRYL          | 4          | 0.08153959      | 0.50101833 | 2.0×10 <sup>-6</sup> | 1              |
| 31 | SIRPB1        | 20         | 0.07908564      | 0.23271969 | 2.0×10 <sup>-6</sup> | 1              |
| 32 | USP46         | 4          | 0.07871925      | 0.11263519 | 2.0×10 <sup>-6</sup> | 1              |
| 33 | SLC4A10       | 2          | 0.07705620      | 0.12719176 | 2.0×10 <sup>-6</sup> | 1              |
| 34 | CPNE1         | 20         | 0.07523397      | 0.32026984 | 2.0×10 <sup>-6</sup> | 1              |
| 35 | FER1L6        | 8          | 0.07413957      | 0.50163815 | 2.0×10 <sup>-6</sup> | 1              |
| 36 | FER1L6-AS1    | 8          | 0.07413957      | 0.50163815 | 2.0×10 <sup>-6</sup> | 1              |
| 37 | UBE4A         | 11         | 0.07396793      | 0.50684932 | 2.0×10 <sup>-6</sup> | 1              |
| 38 | LOC100131626  | 11         | 0.07396793      | 0.50684932 | 2.0×10 <sup>-6</sup> | 1              |
| 39 | NLK           | 17         | 0.07380719      | 0.33165253 | 2.0×10 <sup>-6</sup> | 1              |
| 40 | ENTHD1        | 22         | 0.07378007      | 0.20033285 | 2.0×10 <sup>-6</sup> | 1              |



Table S17: Top 40 SS-G123 sweep candidates at RNA- and protein-coding genes shared between the East Asian JPT and West African YRI populations. Candidates presented are those that remained after application of a mappability and alignability filter to data (see *Materials and Methods*). Target genes that pass the significance threshold are colored in gold in the “*P*-value” column. Genes whose sweeps are assigned as hard ( $\nu = 1$ ) are shaded in red in the “Inferred  $\nu$ ” column, while soft sweeps ( $\nu \geq 2$ ) are colored in blue.

|    | Top gene             | Chromosome | Maximum SS-G123 | G2/G1      | <i>P</i> -value      | Inferred $\nu$ |
|----|----------------------|------------|-----------------|------------|----------------------|----------------|
| 1  | <i>UCHL5</i>         | 1          | 0.16261045      | 0.54330176 | < 10 <sup>-6</sup>   | 2              |
| 2  | <i>CASC4</i>         | 15         | 0.15414538      | 0.02859798 | < 10 <sup>-6</sup>   | 1              |
| 3  | <i>GRIK5</i>         | 19         | 0.15077705      | 0.08571429 | < 10 <sup>-6</sup>   | 1              |
| 4  | <i>ATP6V1A</i>       | 3          | 0.14779863      | 0.51696607 | < 10 <sup>-6</sup>   | 2              |
| 5  | <i>SIRPB1</i>        | 20         | 0.14373282      | 0.17088899 | < 10 <sup>-6</sup>   | 1              |
| 6  | <i>HEMGN</i>         | 9          | 0.14078020      | 0.07985481 | < 10 <sup>-6</sup>   | 1              |
| 7  | <i>KIAA0825</i>      | 5          | 0.13892611      | 0.14634146 | < 10 <sup>-6</sup>   | 1              |
| 8  | <i>EHBP1</i>         | 2          | 0.13344376      | 0.15266860 | < 10 <sup>-6</sup>   | 1              |
| 9  | <i>RP11-554F20.1</i> | 9          | 0.12449166      | 0.28106373 | < 10 <sup>-6</sup>   | 1              |
| 10 | <i>ENTHD1</i>        | 22         | 0.11764075      | 0.12615588 | < 10 <sup>-6</sup>   | 1              |
| 11 | <i>PSMD14</i>        | 2          | 0.10605231      | 0.32749562 | < 10 <sup>-6</sup>   | 1              |
| 12 | <i>NNT</i>           | 5          | 0.10287121      | 0.02879851 | < 10 <sup>-6</sup>   | 1              |
| 13 | <i>EXOC6B</i>        | 2          | -0.09657734     | 0.32384649 | < 10 <sup>-6</sup>   | 1              |
| 14 | <i>DDHD2</i>         | 8          | 0.09268298      | 0.17119048 | < 10 <sup>-6</sup>   | 1              |
| 15 | <i>MIR548AE2</i>     | 16         | 0.09252061      | 0.04543263 | < 10 <sup>-6</sup>   | 1              |
| 16 | <i>LONP2</i>         | 16         | 0.09252061      | 0.04543263 | < 10 <sup>-6</sup>   | 1              |
| 17 | <i>PIGV</i>          | 1          | 0.09246271      | 0.08195141 | < 10 <sup>-6</sup>   | 1              |
| 18 | <i>GRIA4</i>         | 11         | 0.09091467      | 0.24805339 | < 10 <sup>-6</sup>   | 1              |
| 19 | <i>RALGAPA2</i>      | 20         | 0.09018390      | 0.06541614 | < 10 <sup>-6</sup>   | 1              |
| 20 | <i>CSMD3</i>         | 8          | 0.08642643      | 0.10669975 | < 10 <sup>-6</sup>   | 1              |
| 21 | <i>AUTS2</i>         | 7          | 0.08609979      | 0.23589894 | < 10 <sup>-6</sup>   | 1              |
| 22 | <i>MPHOSPH9</i>      | 12         | -0.08463466     | 0.52033195 | < 10 <sup>-6</sup>   | 1              |
| 23 | <i>PPAPDC1B</i>      | 8          | 0.08450565      | 0.28654354 | < 10 <sup>-6</sup>   | 1              |
| 24 | <i>MIR548H3</i>      | 6          | 0.08341730      | 0.14782609 | < 10 <sup>-6</sup>   | 1              |
| 25 | <i>ABCB1</i>         | 7          | 0.08225091      | 0.50471294 | < 10 <sup>-6</sup>   | 1              |
| 26 | <i>RUNDC3B</i>       | 7          | 0.08225091      | 0.50471294 | < 10 <sup>-6</sup>   | 1              |
| 27 | <i>SIPA1L3</i>       | 19         | 0.08082831      | 0.16331995 | < 10 <sup>-6</sup>   | 1              |
| 28 | <i>NLK</i>           | 17         | 0.08023741      | 0.25966716 | < 10 <sup>-6</sup>   | 1              |
| 29 | <i>CPNE1</i>         | 20         | 0.07997871      | 0.11175373 | < 10 <sup>-6</sup>   | 1              |
| 30 | <i>GRIA2</i>         | 4          | 0.07905065      | 0.40514076 | < 10 <sup>-6</sup>   | 1              |
| 31 | <i>CDK6</i>          | 7          | 0.07856601      | 0.11933861 | < 10 <sup>-6</sup>   | 1              |
| 32 | <i>PLEKHA8</i>       | 7          | 0.07799249      | 0.29088472 | < 10 <sup>-6</sup>   | 1              |
| 33 | <i>DKK2</i>          | 4          | 0.07704189      | 0.07856381 | < 10 <sup>-6</sup>   | 1              |
| 34 | <i>SYT1</i>          | 12         | 0.07684115      | 0.12255668 | < 10 <sup>-6</sup>   | 1              |
| 35 | <i>COL7A1</i>        | 3          | 0.07658377      | 0.07582045 | < 10 <sup>-6</sup>   | 1              |
| 36 | <i>GSTT1</i>         | 22         | 0.07574164      | 0.10880196 | < 10 <sup>-6</sup>   | 1              |
| 37 | <i>FBXW4</i>         | 10         | 0.07431220      | 0.15773660 | 1.0×10 <sup>-6</sup> | 1              |
| 38 | <i>USP46</i>         | 4          | 0.07174521      | 0.19367210 | 1.0×10 <sup>-6</sup> | 1              |
| 39 | <i>AC016582.2</i>    | 19         | 0.07004390      | 0.18775372 | 1.0×10 <sup>-6</sup> | 1              |
| 40 | <i>ARID1A</i>        | 1          | 0.06960214      | 0.02739301 | 1.0×10 <sup>-6</sup> | 1              |

Table S18: Top 40 SS-G123 sweep candidates at RNA- and protein-coding genes shared between the East Asian JPT and South Asian GIH populations. Candidates presented are those that remained after application of a mappability and alignability filter to data (see *Materials and Methods*). Target genes that pass the significance threshold are colored in gold in the “*P*-value” column. Genes whose sweeps are assigned as hard ( $\nu = 1$ ) are shaded in red in the “Inferred  $\nu$ ” column, while soft sweeps ( $\nu \geq 2$ ) are colored in blue.

|    | Top gene            | Chromosome | Maximum SS-G123 | G2/G1      | <i>P</i> -value    | Inferred $\nu$ |
|----|---------------------|------------|-----------------|------------|--------------------|----------------|
| 1  | <i>RUNX1T1</i>      | 8          | 0.19081280      | 0.08034745 | < 10 <sup>-6</sup> | 1              |
| 2  | <i>P4HTM</i>        | 3          | 0.17561530      | 0.02724586 | < 10 <sup>-6</sup> | 1              |
| 3  | <i>EXOC6B</i>       | 2          | 0.11912726      | 0.09503897 | < 10 <sup>-6</sup> | 1              |
| 4  | <i>TMTC2</i>        | 12         | 0.11638215      | 0.18265334 | < 10 <sup>-6</sup> | 1              |
| 5  | <i>SUGCT</i>        | 7          | 0.11594031      | 0.12736706 | < 10 <sup>-6</sup> | 1              |
| 6  | <i>HELZ</i>         | 17         | 0.11386077      | 0.35123207 | < 10 <sup>-6</sup> | 2              |
| 7  | <i>DBT</i>          | 1          | 0.11216524      | 0.06377143 | < 10 <sup>-6</sup> | 1              |
| 8  | <i>BCAS3</i>        | 17         | 0.10947050      | 0.06812121 | < 10 <sup>-6</sup> | 1              |
| 9  | <i>RP11-53O19.1</i> | 5          | 0.10879938      | 0.52299606 | < 10 <sup>-6</sup> | 2              |
| 10 | <i>ZNF546</i>       | 19         | 0.09867813      | 0.13472000 | < 10 <sup>-6</sup> | 1              |
| 11 | <i>ADAMTS6</i>      | 5          | 0.09839895      | 0.49891634 | < 10 <sup>-6</sup> | 2              |
| 12 | <i>APPBP2</i>       | 17         | 0.09796838      | 0.09183407 | < 10 <sup>-6</sup> | 1              |
| 13 | <i>DR1</i>          | 1          | 0.09702526      | 0.42016095 | < 10 <sup>-6</sup> | 1              |
| 14 | <i>USP25</i>        | 21         | 0.09547922      | 0.16971106 | < 10 <sup>-6</sup> | 1              |
| 15 | <i>RNF121</i>       | 11         | 0.09440660      | 0.09574218 | < 10 <sup>-6</sup> | 1              |
| 16 | <i>NEGR1</i>        | 1          | 0.09420501      | 0.28005997 | < 10 <sup>-6</sup> | 1              |
| 17 | <i>RNU6-28P</i>     | 15         | 0.09050468      | 0.27059635 | < 10 <sup>-6</sup> | 1              |
| 18 | <i>PPIP5K1</i>      | 15         | 0.09050468      | 0.27059635 | < 10 <sup>-6</sup> | 1              |
| 19 | <i>ORC2</i>         | 2          | 0.08524372      | 0.07114440 | < 10 <sup>-6</sup> | 1              |
| 20 | <i>HDAC1</i>        | 1          | 0.08444452      | 0.12845175 | < 10 <sup>-6</sup> | 1              |
| 21 | <i>USP32</i>        | 17         | 0.08419480      | 0.14071582 | < 10 <sup>-6</sup> | 1              |
| 22 | <i>CCDC18</i>       | 1          | 0.08341467      | 0.34291581 | < 10 <sup>-6</sup> | 1              |
| 23 | <i>LYRM7</i>        | 5          | 0.08066234      | 0.07455296 | < 10 <sup>-6</sup> | 1              |
| 24 | <i>LOC100188947</i> | 10         | 0.08039944      | 0.38098427 | < 10 <sup>-6</sup> | 1              |
| 25 | <i>HECTD2</i>       | 10         | 0.08039944      | 0.38098427 | < 10 <sup>-6</sup> | 1              |
| 26 | <i>SSH2</i>         | 17         | 0.07918183      | 0.29931234 | < 10 <sup>-6</sup> | 1              |
| 27 | <i>ZNF780B</i>      | 19         | 0.07884324      | 0.14236707 | < 10 <sup>-6</sup> | 1              |
| 28 | <i>NLK</i>          | 17         | 0.07866030      | 0.15058966 | < 10 <sup>-6</sup> | 1              |
| 29 | <i>MTF2</i>         | 1          | 0.07827113      | 0.56458636 | < 10 <sup>-6</sup> | 2              |
| 30 | <i>ATP6V0D1</i>     | 16         | 0.07404407      | 0.08471815 | < 10 <sup>-6</sup> | 1              |
| 31 | <i>MBOAT2</i>       | 2          | 0.07358927      | 0.11950505 | < 10 <sup>-6</sup> | 1              |
| 32 | <i>BCL2L1</i>       | 20         | 0.07326540      | 0.13298940 | < 10 <sup>-6</sup> | 1              |
| 33 | <i>CENPW</i>        | 6          | 0.07324676      | 0.21777778 | < 10 <sup>-6</sup> | 1              |
| 34 | <i>BEND4</i>        | 4          | 0.07308935      | 0.08658982 | < 10 <sup>-6</sup> | 1              |
| 35 | <i>LINC00478</i>    | 21         | 0.07294715      | 0.17406645 | < 10 <sup>-6</sup> | 1              |
| 36 | <i>XXYLT1</i>       | 3          | 0.07133674      | 0.10906096 | < 10 <sup>-6</sup> | 1              |
| 37 | <i>ABCB1</i>        | 7          | 0.07111757      | 0.14704879 | < 10 <sup>-6</sup> | 1              |
| 38 | <i>RUNDC3B</i>      | 7          | 0.07111757      | 0.14704879 | < 10 <sup>-6</sup> | 1              |
| 39 | <i>NGLY1</i>        | 3          | 0.06960764      | 0.15325248 | < 10 <sup>-6</sup> | 1              |
| 40 | <i>CELSR3</i>       | 3          | 0.06809979      | 0.09836612 | < 10 <sup>-6</sup> | 1              |

Table S19: Top 40 SS-G123 sweep candidates at RNA- and protein-coding genes shared between the East Asian JPT and Southeast Asian KHV populations. Candidates presented are those that remained after application of a mappability and alignability filter to data (see *Materials and Methods*). Target genes that pass the significance threshold are colored in gold in the “*P*-value” column. Genes whose sweeps are assigned as hard ( $\nu = 1$ ) are shaded in red in the “Inferred  $\nu$ ” column, while soft sweeps ( $\nu \geq 2$ ) are colored in blue.

|    | Top gene             | Chromosome | Maximum SS-G123 | G2/G1      | <i>P</i> -value      | Inferred $\nu$ |
|----|----------------------|------------|-----------------|------------|----------------------|----------------|
| 1  | <i>SPIDR</i>         | 8          | 0.2784003       | 0.38334810 | < 10 <sup>-6</sup>   | 2              |
| 2  | <i>RP11-696N14.1</i> | 4          | 0.2744507       | 0.20046722 | < 10 <sup>-6</sup>   | 2              |
| 3  | <i>EXOC6B</i>        | 2          | 0.2617294       | 0.03631803 | < 10 <sup>-6</sup>   | 1              |
| 4  | <i>RUNX1T1</i>       | 8          | 0.2599384       | 0.06254055 | < 10 <sup>-6</sup>   | 1              |
| 5  | <i>SPAG6</i>         | 10         | 0.2444433       | 0.03124657 | < 10 <sup>-6</sup>   | 1              |
| 6  | <i>EXD2</i>          | 14         | 0.2338336       | 0.06551773 | < 10 <sup>-6</sup>   | 1              |
| 7  | <i>P4HTM</i>         | 3          | 0.2265336       | 0.02184214 | < 10 <sup>-6</sup>   | 1              |
| 8  | <i>AMBRA1</i>        | 11         | 0.2041819       | 0.07887964 | < 10 <sup>-6</sup>   | 1              |
| 9  | <i>BCL7C</i>         | 16         | 0.2019106       | 0.04684318 | < 10 <sup>-6</sup>   | 1              |
| 10 | <i>BCL2L1</i>        | 20         | 0.1971090       | 0.09232554 | < 10 <sup>-6</sup>   | 1              |
| 11 | <i>ADH1A</i>         | 4          | 0.1963534       | 0.27346115 | < 10 <sup>-6</sup>   | 2              |
| 12 | <i>PGAP1</i>         | 2          | 0.1945704       | 0.09764099 | < 10 <sup>-6</sup>   | 1              |
| 13 | <i>C11orf49</i>      | 11         | 0.1898302       | 0.18259828 | 3.0×10 <sup>-6</sup> | 2              |
| 14 | <i>PRPF40B</i>       | 12         | 0.1861633       | 0.03307622 | 6.0×10 <sup>-6</sup> | 1              |
| 15 | <i>LOC100188947</i>  | 10         | 0.1858056       | 0.47456664 | 6.0×10 <sup>-6</sup> | 2              |
| 16 | <i>HECTD2</i>        | 10         | 0.1858056       | 0.47456664 | 6.0×10 <sup>-6</sup> | 2              |
| 17 | <i>NOVA1</i>         | 14         | 0.1830759       | 0.49632253 | 7.0×10 <sup>-6</sup> | 2              |
| 18 | <i>ZNF282</i>        | 7          | 0.1813378       | 0.05366309 | 7.0×10 <sup>-6</sup> | 1              |
| 19 | <i>HMCN1</i>         | 1          | 0.1764870       | 0.47648708 | 8.0×10 <sup>-6</sup> | 2              |
| 20 | <i>PHYHIPL</i>       | 10         | 0.1743157       | 0.07840000 | 8.0×10 <sup>-6</sup> | 1              |
| 21 | <i>LINC01024</i>     | 5          | 0.1742617       | 0.13723019 | 8.0×10 <sup>-6</sup> | 1              |
| 22 | <i>ARIH2</i>         | 3          | 0.1734230       | 0.06296852 | 8.0×10 <sup>-6</sup> | 1              |
| 23 | <i>PURA</i>          | 5          | 0.1727126       | 0.13155916 | 9.0×10 <sup>-6</sup> | 1              |
| 24 | <i>ARIH2OS</i>       | 3          | 0.1680339       | 0.05414495 | 1.2×10 <sup>-5</sup> | 1              |
| 25 | <i>TRUB1</i>         | 10         | 0.1677889       | 0.06171946 | 1.2×10 <sup>-5</sup> | 1              |
| 26 | <i>CEP112</i>        | 17         | 0.1663139       | 0.06596257 | 1.4×10 <sup>-5</sup> | 1              |
| 27 | <i>USP38</i>         | 4          | 0.1643823       | 0.14698163 | 1.5×10 <sup>-5</sup> | 1              |
| 28 | <i>C2orf66</i>       | 2          | 0.1629327       | 0.04013059 | 1.5×10 <sup>-5</sup> | 1              |
| 29 | <i>LINC01088</i>     | 4          | 0.1622231       | 0.12088799 | 1.5×10 <sup>-5</sup> | 1              |
| 30 | <i>TRMT11</i>        | 6          | 0.1609308       | 0.04417217 | 1.6×10 <sup>-5</sup> | 1              |
| 31 | <i>CCDC18</i>        | 1          | 0.1591868       | 0.39498058 | 1.6×10 <sup>-5</sup> | 2              |
| 32 | <i>LINC00536</i>     | 8          | 0.1575138       | 0.53060485 | 1.6×10 <sup>-5</sup> | 3              |
| 33 | <i>CSPP1</i>         | 8          | 0.1570753       | 0.46273402 | 1.6×10 <sup>-5</sup> | 2              |
| 34 | <i>RAD51B</i>        | 14         | 0.1546937       | 0.07764864 | 1.6×10 <sup>-5</sup> | 1              |
| 35 | <i>SPATS2</i>        | 12         | 0.1543295       | 0.07337854 | 1.6×10 <sup>-5</sup> | 1              |
| 36 | <i>FBXO4</i>         | 5          | 0.1535929       | 0.03908674 | 1.6×10 <sup>-5</sup> | 1              |
| 37 | <i>PKIA</i>          | 8          | 0.1529611       | 0.23342175 | 1.7×10 <sup>-5</sup> | 2              |
| 38 | <i>GPHN</i>          | 14         | 0.1511221       | 0.41336881 | 1.7×10 <sup>-5</sup> | 2              |
| 39 | <i>ZNF660</i>        | 3          | 0.1509682       | 0.12457299 | 1.7×10 <sup>-5</sup> | 1              |
| 40 | <i>OXCT1</i>         | 5          | 0.1500597       | 0.04652922 | 1.8×10 <sup>-5</sup> | 1              |

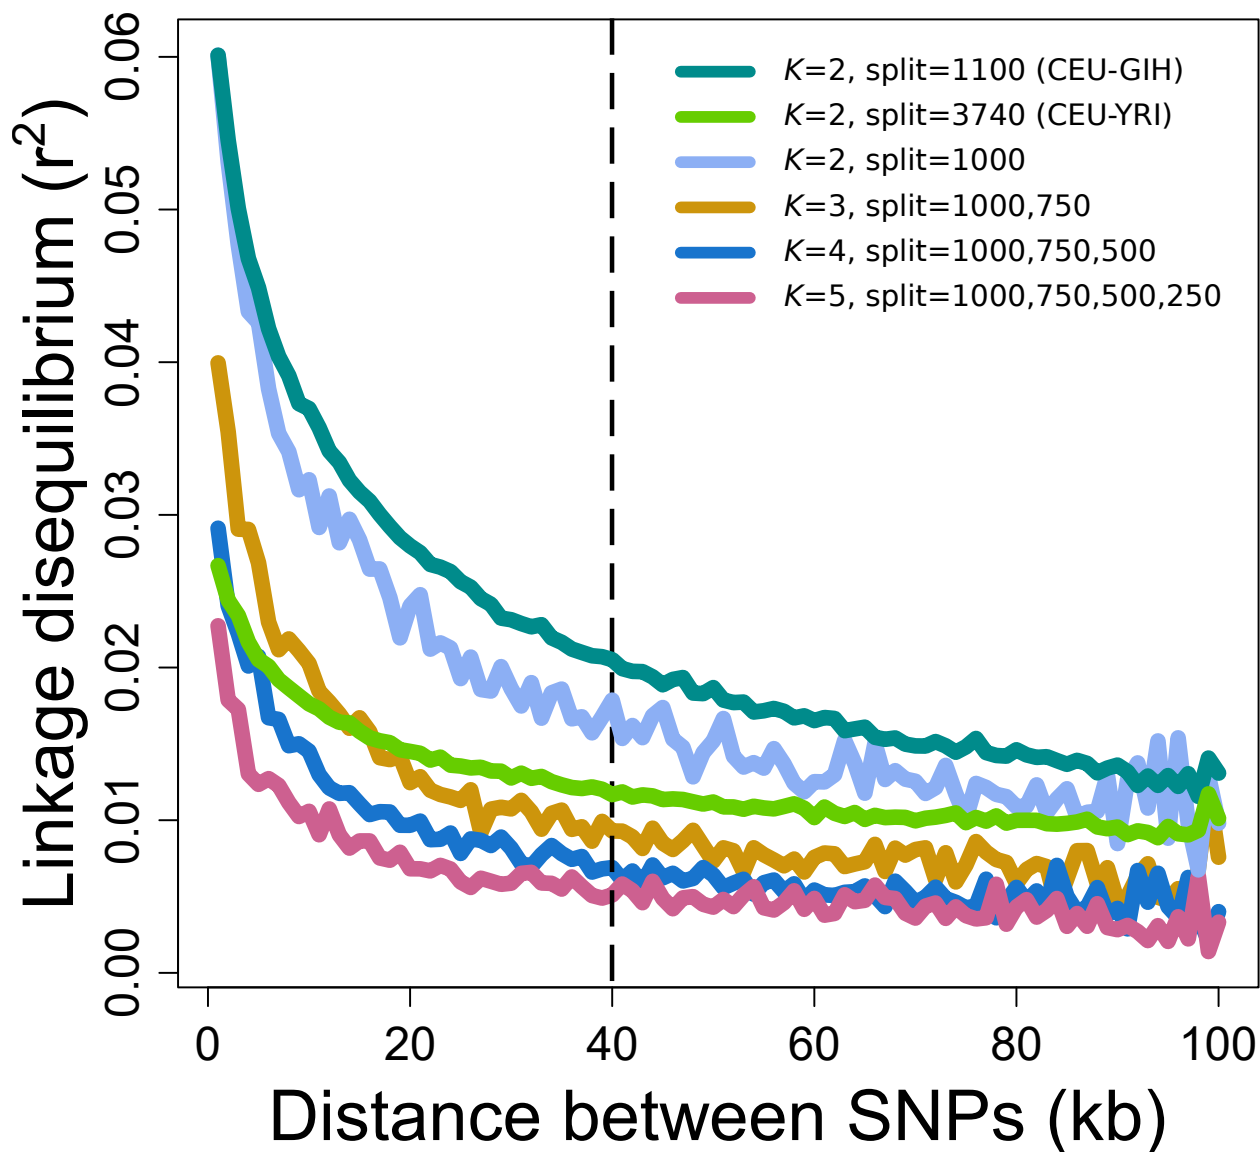

Figure S1: Decay of pairwise LD measured as  $r^2$  over 100 kb for pooled samples simulated under neutrality containing two to five populations. For pairs of populations (cyan, chartreuse, and sky blue), we simulated under the CEU-GIH ( $\tau = 1100$ ) or CEU-YRI ( $\tau = 3740$ ) human demographic models, or a simplified constant demographic history model ( $\tau = 1000$ ) with  $N = 10^4$ , where the ancestral population splits once. For trios of populations (goldenrod), two splits underlie the sample phylogeny, occurring  $\tau_1 = 1000$  and  $\tau_2 = 750$  generations before sampling. For quartets of populations (dark blue), there are three splits occurring at  $\tau_1 = 1000$ ,  $\tau_2 = 750$ , and  $\tau_3 = 500$  generations before sampling. Finally,  $K = 5$  phylogenies result from four splits, at  $\tau_1 = 1000$ ,  $\tau_2 = 750$ ,  $\tau_3 = 500$ , and  $\tau_4 = 250$  generations before sampling. All samples are identical to those analyzed in the main text.

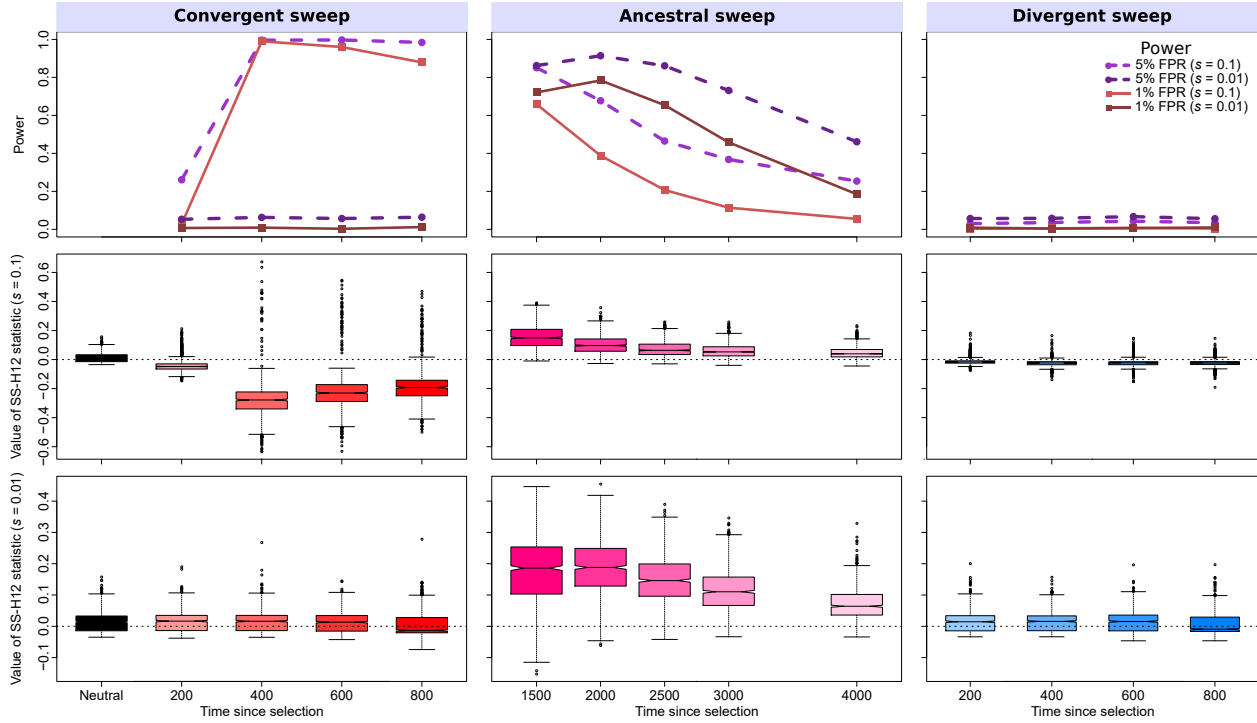

Figure S2: Properties of SS-H12 for simulated strong ( $s = 0.1$ ) and moderate ( $s = 0.01$ ) soft sweep ( $\nu = 4$ ) scenarios under the CEU-GIH model ( $\tau = 1100$  generations before sampling). (Top row) Power at 1% (red lines) and 5% (purple lines) false positive rates (FPRs) to detect recent ancestral, convergent, and divergent soft sweeps from selection on standing genetic variation as a function of time at which selection of the favored haplotypes initiated ( $t$ ), with FPR based on the distribution of maximum  $|\text{SS-H12}|$  across simulated neutral replicates. (Middle row) Box plots summarizing the distribution of SS-H12 values from windows of maximum  $|\text{SS-H12}|$  across strong sweep replicates, corresponding to each time point in the power curves, with dashed lines in each panel representing  $\text{SS-H12} = 0$ . (Bottom row) Box plots summarizing the distribution of SS-H12 values across moderate sweep replicates. For convergent and divergent sweeps,  $t < \tau$ , while for ancestral sweeps,  $t > \tau$ . All replicate samples for the CEU-GIH model contain 99 simulated CEU individuals and 103 simulated GIH individuals, as in the 1000 Genomes Project dataset [Auton et al., 2015], and we performed 1000 replicates for each scenario.

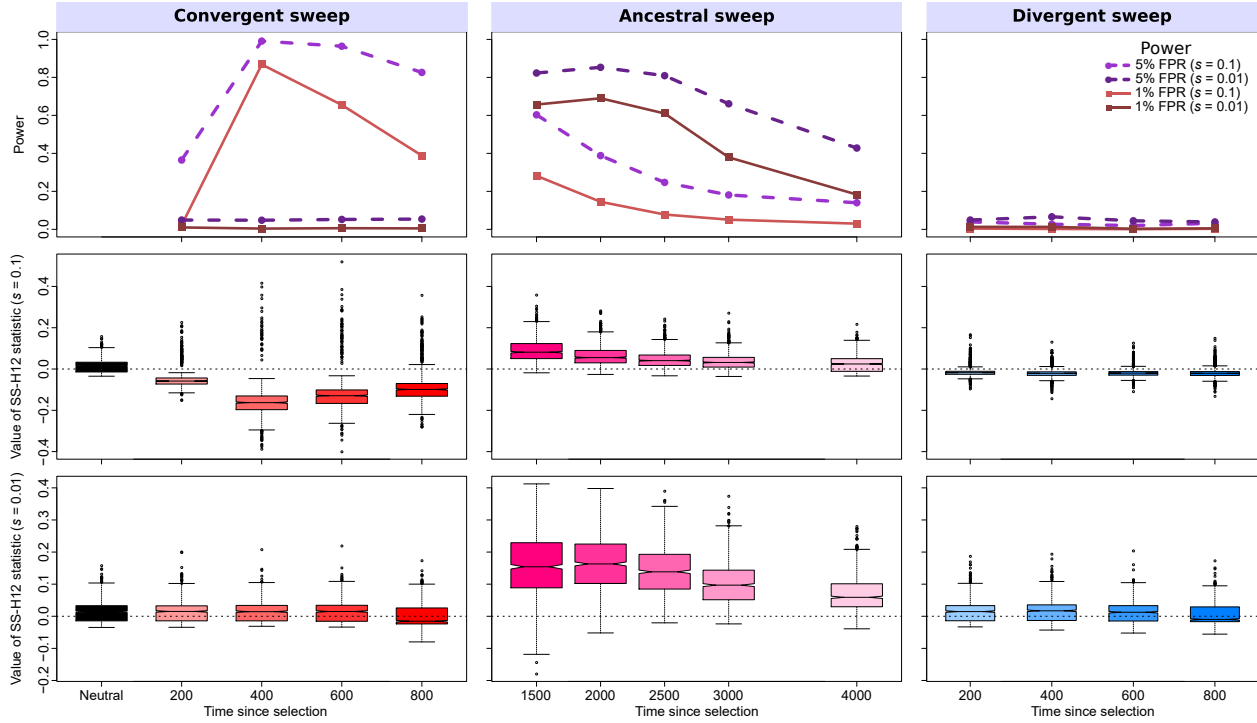

Figure S3: Properties of SS-H12 for simulated strong ( $s = 0.1$ ) and moderate ( $s = 0.01$ ) soft sweep ( $\nu = 8$ ) scenarios under the CEU-GIH model ( $\tau = 1100$  generations before sampling). (Top row) Power at 1% (red lines) and 5% (purple lines) false positive rates (FPRs) to detect recent ancestral, convergent, and divergent soft sweeps from selection on standing genetic variation as a function of time at which selection of the favored haplotypes initiated ( $t$ ), with FPR based on the distribution of maximum  $|\text{SS-H12}|$  across simulated neutral replicates. (Middle row) Box plots summarizing the distribution of SS-H12 values from windows of maximum  $|\text{SS-H12}|$  across strong sweep replicates, corresponding to each time point in the power curves, with dashed lines in each panel representing  $\text{SS-H12} = 0$ . (Bottom row) Box plots summarizing the distribution of SS-H12 values across moderate sweep replicates. For convergent and divergent sweeps,  $t < \tau$ , while for ancestral sweeps,  $t > \tau$ . All replicate samples for the CEU-GIH model contain 99 simulated CEU individuals and 103 simulated GIH individuals, as in the 1000 Genomes Project dataset [Auton et al., 2015], and we performed 1000 replicates for each scenario.

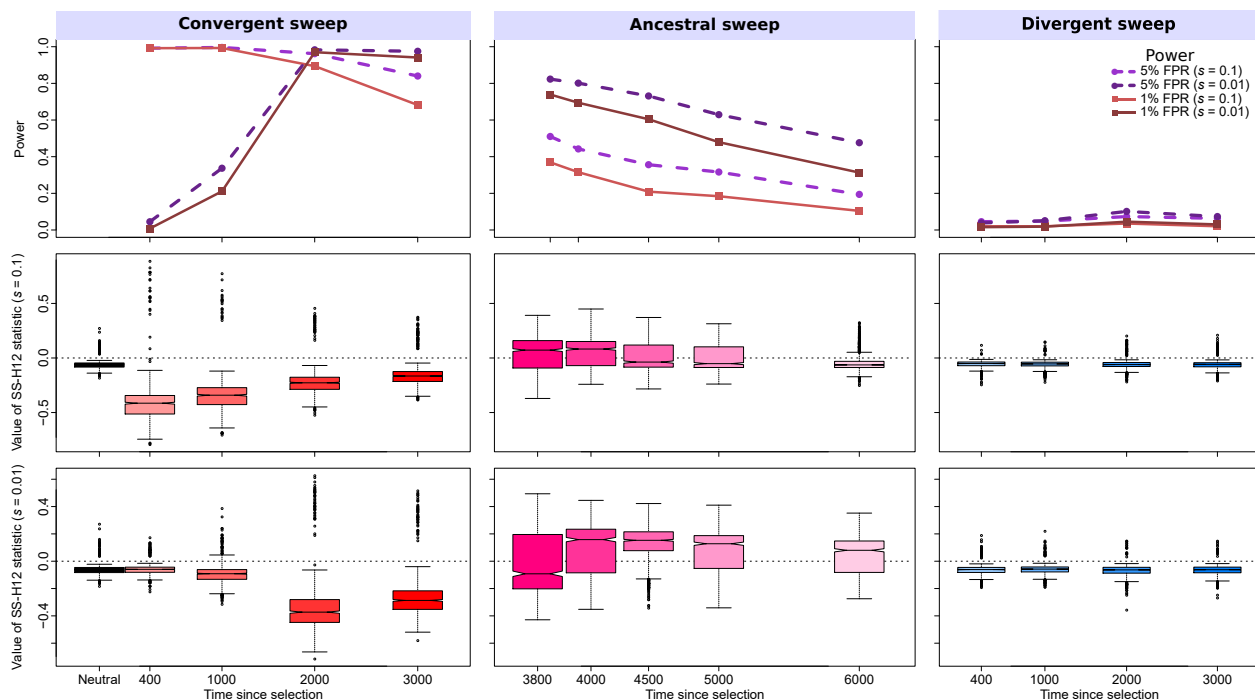

Figure S4: Properties of SS-H12 for simulated strong ( $s = 0.1$ ) and moderate ( $s = 0.01$ ) soft sweep ( $\nu = 4$ ) scenarios under the CEU-YRI model ( $\tau = 3740$  generations before sampling). (Top row) Power at 1% (red lines) and 5% (purple lines) false positive rates (FPRs) to detect recent ancestral, convergent, and divergent soft sweeps from selection on standing genetic variation as a function of time at which selection of the favored haplotypes initiated ( $t$ ), with FPR based on the distribution of maximum  $|\text{SS-H12}|$  across simulated neutral replicates. (Middle row) Box plots summarizing the distribution of SS-H12 values from windows of maximum  $|\text{SS-H12}|$  across strong sweep replicates, corresponding to each time point in the power curves, with dashed lines in each panel representing  $\text{SS-H12} = 0$ . (Bottom row) Box plots summarizing the distribution of SS-H12 values across moderate sweep replicates. For convergent and divergent sweeps,  $t < \tau$ , while for ancestral sweeps,  $t > \tau$ . All replicate samples for the CEU-YRI model contain 99 simulated CEU individuals and 108 simulated YRI individuals, as in the 1000 Genomes Project dataset [Auton et al., 2015], and we performed 1000 replicates for each scenario.

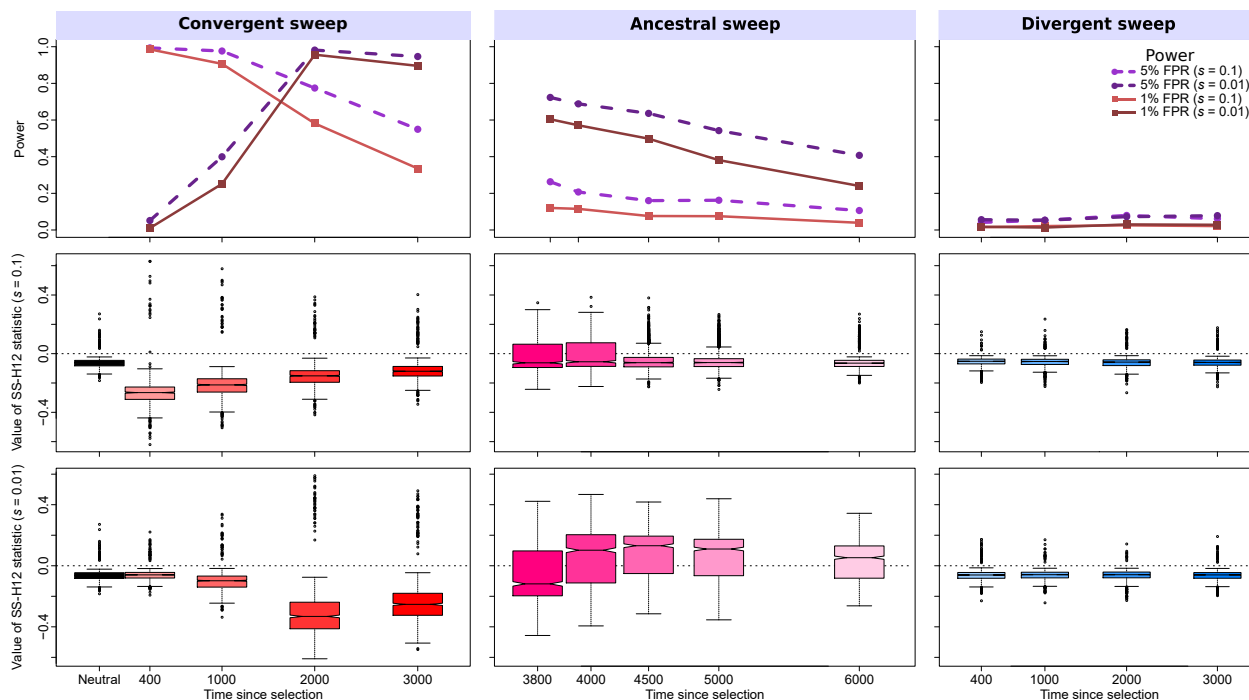

Figure S5: Properties of SS-H12 for simulated strong ( $s = 0.1$ ) and moderate ( $s = 0.01$ ) soft sweep ( $\nu = 8$ ) scenarios under the CEU-YRI model ( $\tau = 3740$  generations before sampling). (Top row) Power at 1% (red lines) and 5% (purple lines) false positive rates (FPRs) to detect recent ancestral, convergent, and divergent soft sweeps from selection on standing genetic variation as a function of time at which selection of the favored haplotypes initiated ( $t$ ), with FPR based on the distribution of maximum  $|\text{SS-H12}|$  across simulated neutral replicates. (Middle row) Box plots summarizing the distribution of SS-H12 values from windows of maximum  $|\text{SS-H12}|$  across strong sweep replicates, corresponding to each time point in the power curves, with dashed lines in each panel representing  $\text{SS-H12} = 0$ . (Bottom row) Box plots summarizing the distribution of SS-H12 values across moderate sweep replicates. For convergent and divergent sweeps,  $t < \tau$ , while for ancestral sweeps,  $t > \tau$ . All replicate samples for the CEU-YRI model contain 99 simulated CEU individuals and 108 simulated YRI individuals, as in the 1000 Genomes Project dataset [Auton et al., 2015], and we performed 1000 replicates for each scenario.



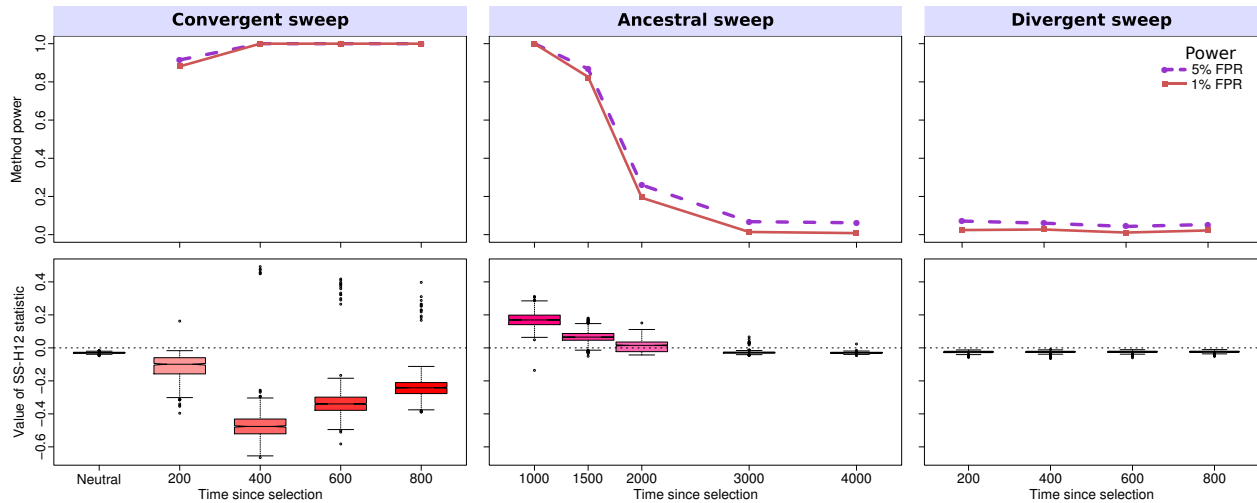

Figure S6: Properties of SS-H12 for simulated hard sweep scenarios for samples drawn from  $K = 2$  equally-sized populations in which  $\tau = 1000$  generations before sampling, for a constant demographic history in which  $N = 10^4$  for the duration of the simulation. (Top) Power at 1 and 5% false positive rates (FPRs) to detect recent ancestral, convergent, and divergent hard sweeps (see Figure 1) as a function of time at which selection initiated, with false positive rate based on the distribution of maximum  $|\text{SS-H12}|$  across simulated neutral replicates. (Middle row) Box plots summarizing the distribution of SS-H12 values from windows of maximum  $|\text{SS-H12}|$  for each replicate, corresponding to each point in the power curve, with dashed lines in each panel representing  $\text{SS-H12} = 0$ . Convergent and divergent sweeps occur after this time (200-800 generations before sampling), while ancestral sweeps occur before this time (1100-4000 generations before sampling). All sweeps are strong ( $s = 0.1$ ) for a sample of  $n = 100$  diploid individuals per population, with 1000 replicates performed for each scenario.

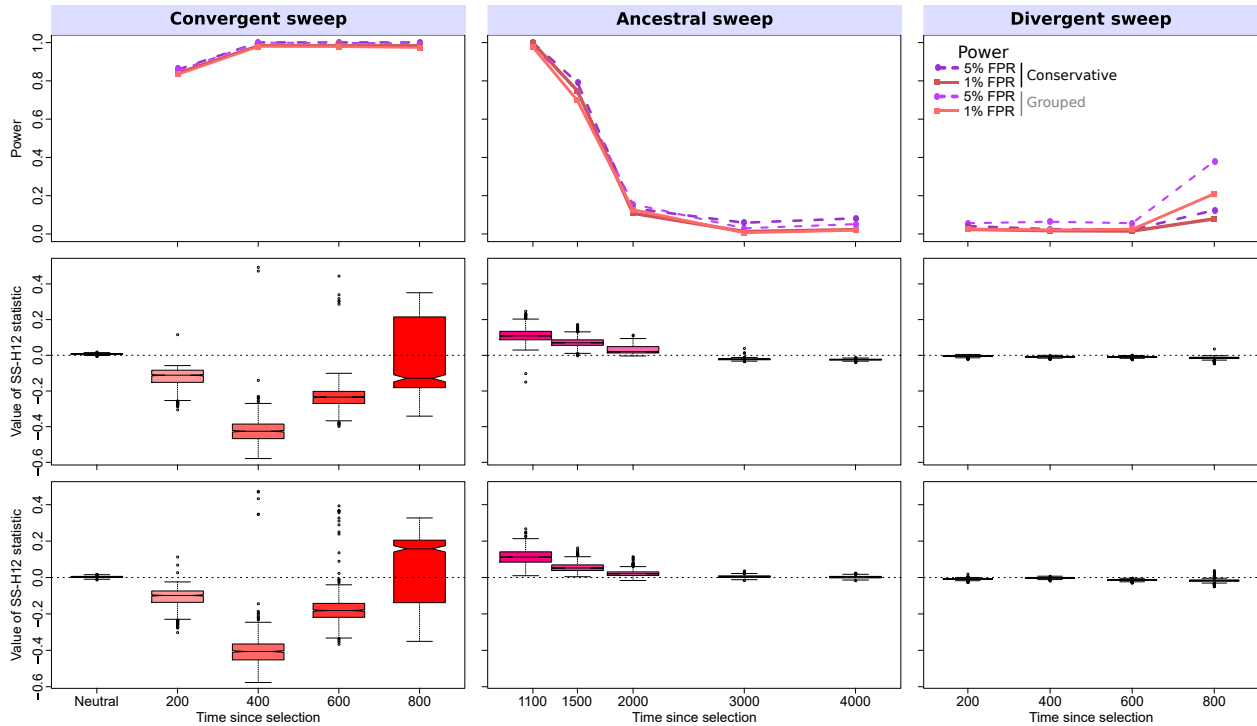

Figure S7: Properties of SS-H12 for simulated hard sweep scenarios for samples drawn from  $K = 3$  equally-sized populations in which  $\tau_1 = 1000$  and  $\tau_2 = 750$  generations before sampling. (Top) Power at 1 and 5% false positive rates (FPRs) to detect recent ancestral, convergent, and divergent hard sweeps (see Figure 1) as a function of time at which selection initiated, with false positive rate based on the distribution of maximum  $|\text{SS-H12}|$  across simulated neutral replicates. (Middle and bottom rows) Box plots summarizing the distribution of SS-H12 values from windows of maximum  $|\text{SS-H12}|$  for each replicate, corresponding to each point in the power curve for conservative (middle row) and grouped (bottom row) approaches, with dashed lines in each panel representing  $\text{SS-H12} = 0$ . Convergent and divergent sweeps occur after this time (200-800 generations before sampling), while ancestral sweeps occur before this time (1100-4000 generations before sampling). All sweeps are strong ( $s = 0.1$ ) for a sample of  $n = 100$  diploid individuals per population, with 1000 replicates performed for each scenario.

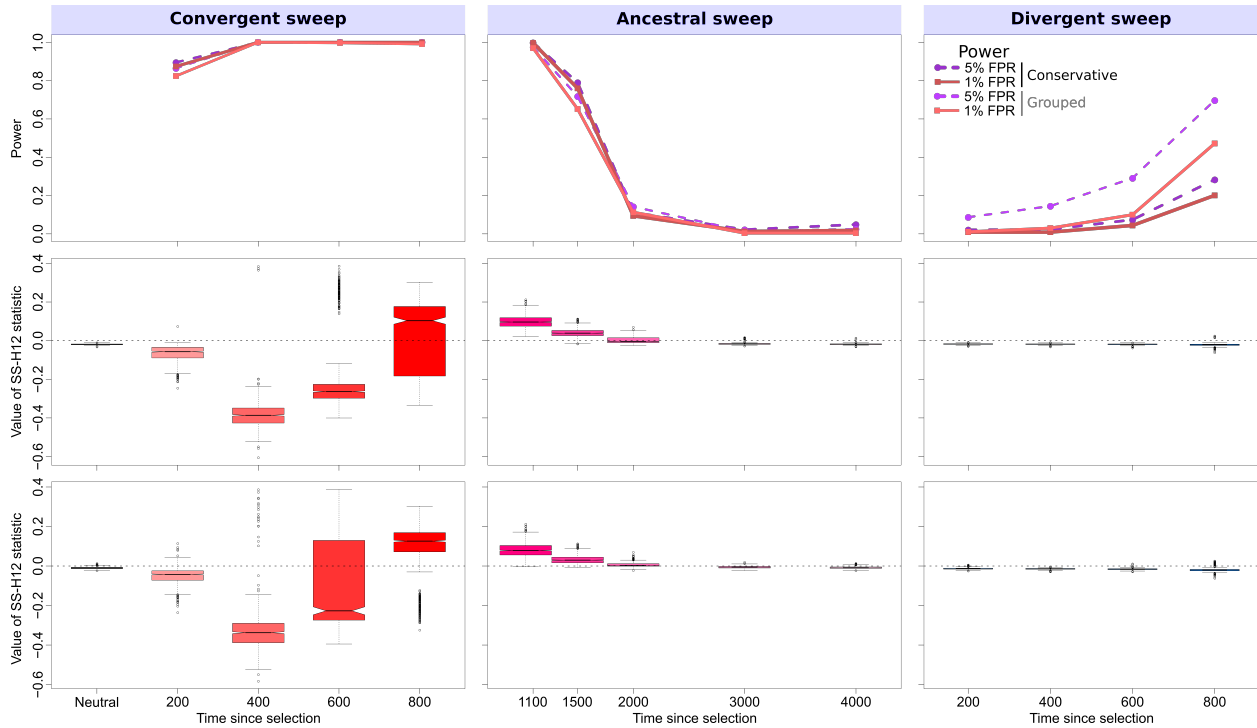

Figure S8: Properties of SS-H12 for simulated hard sweep scenarios for samples drawn from  $K = 4$  equally-sized populations in which  $\tau_1 = 1000$ ,  $\tau_2 = 750$ , and  $\tau_3 = 500$  generations before sampling. (Top row) Power at 1 and 5% false positive rates (FPRs) to detect recent ancestral, convergent, and divergent hard sweeps (see Figure 1) as a function of time at which selection initiated, with false positive rate based on the distribution of maximum  $|\text{SS-H12}|$  across simulated neutral replicates. (Middle and bottom rows) Box plots summarizing the distribution of SS-H12 values from windows of maximum  $|\text{SS-H12}|$  for each replicate, corresponding to each point in the power curve for conservative (middle row) and grouped (bottom row) approaches, with dashed lines in each panel representing  $\text{SS-H12} = 0$ . Convergent and divergent sweeps occur after this time (200-800 generations before sampling), while ancestral sweeps occur before this time (1100-4000 generations before sampling). All sweeps are strong ( $s = 0.1$ ) for a sample of  $n = 100$  diploid individuals per population, with 1000 replicates performed for each scenario.

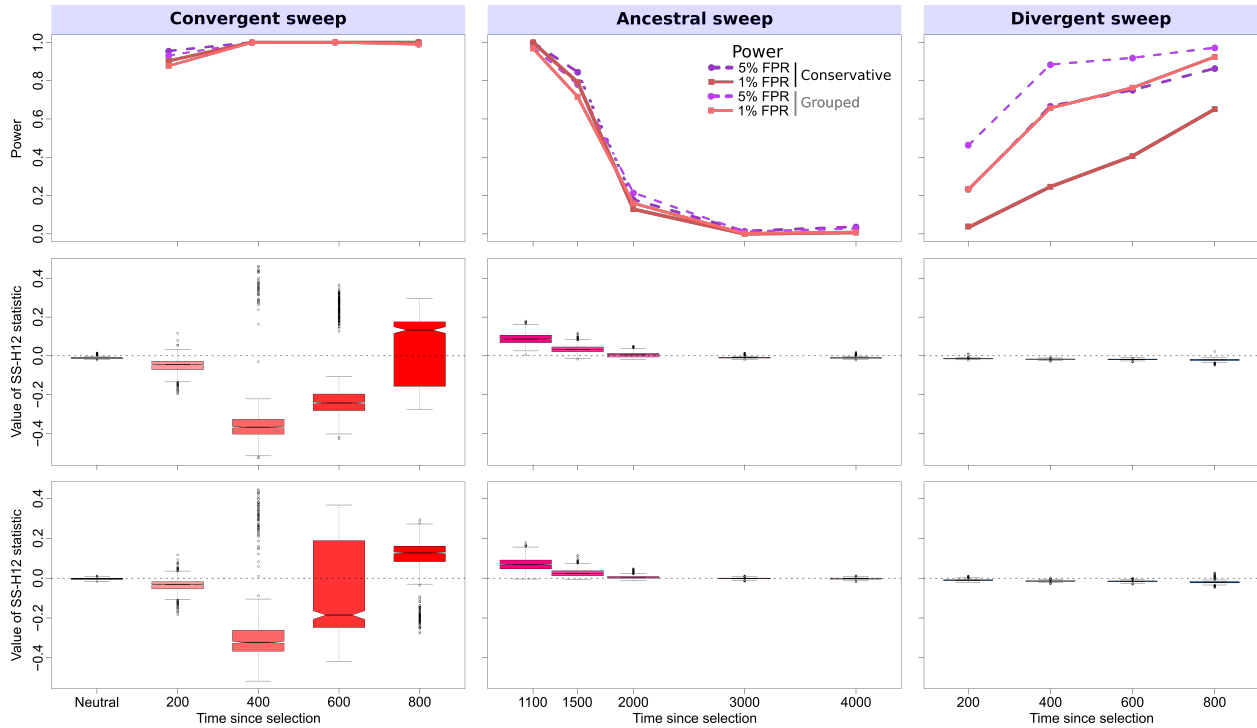

Figure S9: Properties of SS-H12 for simulated hard sweep scenarios for samples drawn from  $K = 5$  equally-sized populations in which  $\tau_1 = 1000$ ,  $\tau_2 = 750$ ,  $\tau_3 = 500$ , and  $\tau_4 = 250$  generations before sampling. (Top row) Power at 1 and 5% false positive rates (FPRs) to detect recent ancestral, convergent, and divergent hard sweeps (see Figure 1) as a function of time at which selection initiated, with false positive rate based on the distribution of maximum  $|\text{SS-H12}|$  across simulated neutral replicates. (Middle and bottom rows) Box plots summarizing the distribution of SS-H12 values from windows of maximum  $|\text{SS-H12}|$  for each replicate, corresponding to each point in the power curve for conservative (middle row) and grouped (bottom row) approaches, with dashed lines in each panel representing  $\text{SS-H12} = 0$ . Convergent and divergent sweeps occur after this time (200-800 generations before sampling), while ancestral sweeps occur before this time (1100-4000 generations before sampling). All sweeps are strong ( $s = 0.1$ ) for a sample of  $n = 100$  diploid individuals per population, with 1000 replicates performed for each scenario.

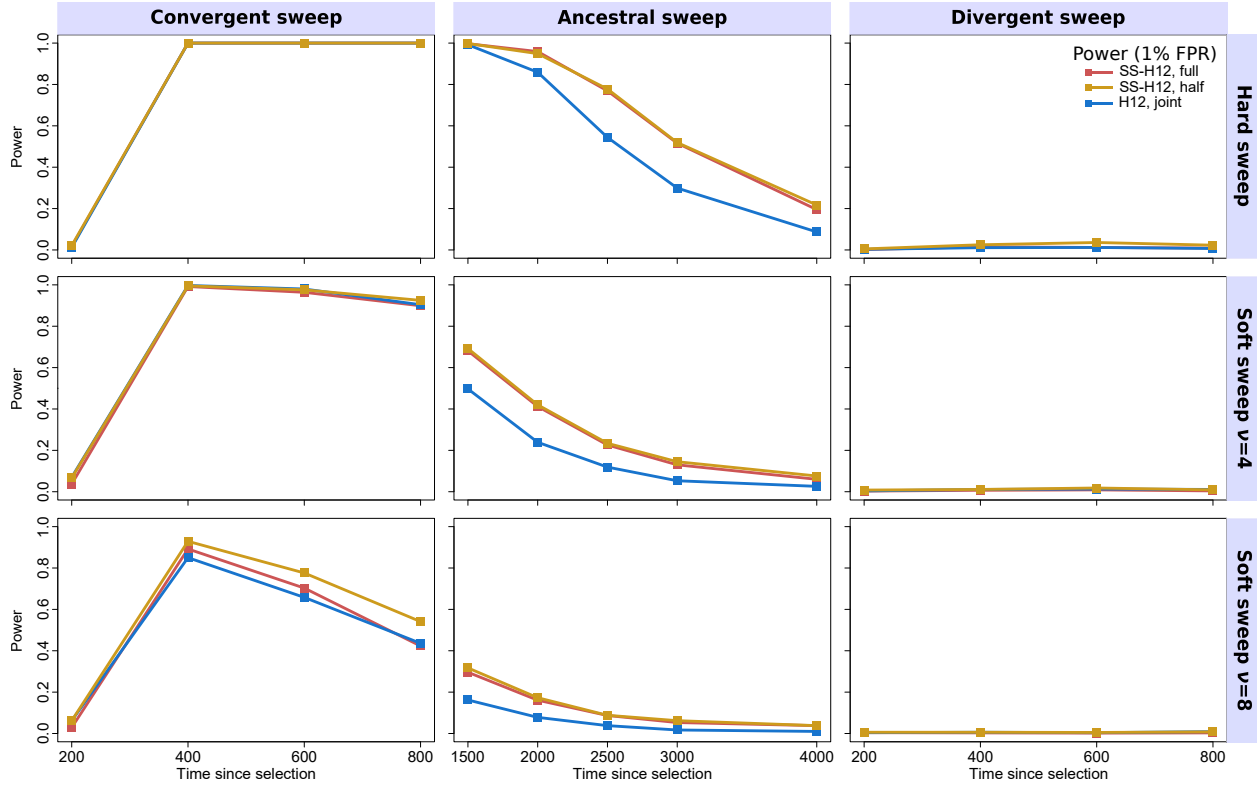

Figure S10: Powers of SS-H12 and H12 at a 1% false positive rate to detect recent ancestral, convergent, and divergent simulated strong ( $s = 0.1$ ) selective sweeps under the CEU-GIH model ( $\tau = 1100$  generations before sampling) for hard (top) and soft ( $\nu = 4$ , middle;  $\nu = 8$ , bottom) sweeps as a function of time at which positive selection of the favored allele initiated ( $t$ ), with FPR based on the distribution of maximum  $|\text{SS-H12}|$  or H12 across simulated neutral replicates. “SS-H12, full” refers to analyses in which we generated full-size pooled samples consisting of 99 simulated CEU individuals and 103 simulated GIH individuals, whereas “SS-H12, half” used only half of the alleles in each sample. “H12, joint” analyses used the full sample size for both populations. For convergent and divergent sweeps,  $t < \tau$ , while for ancestral sweeps,  $t > \tau$ . We performed 1000 replicates for each scenario.

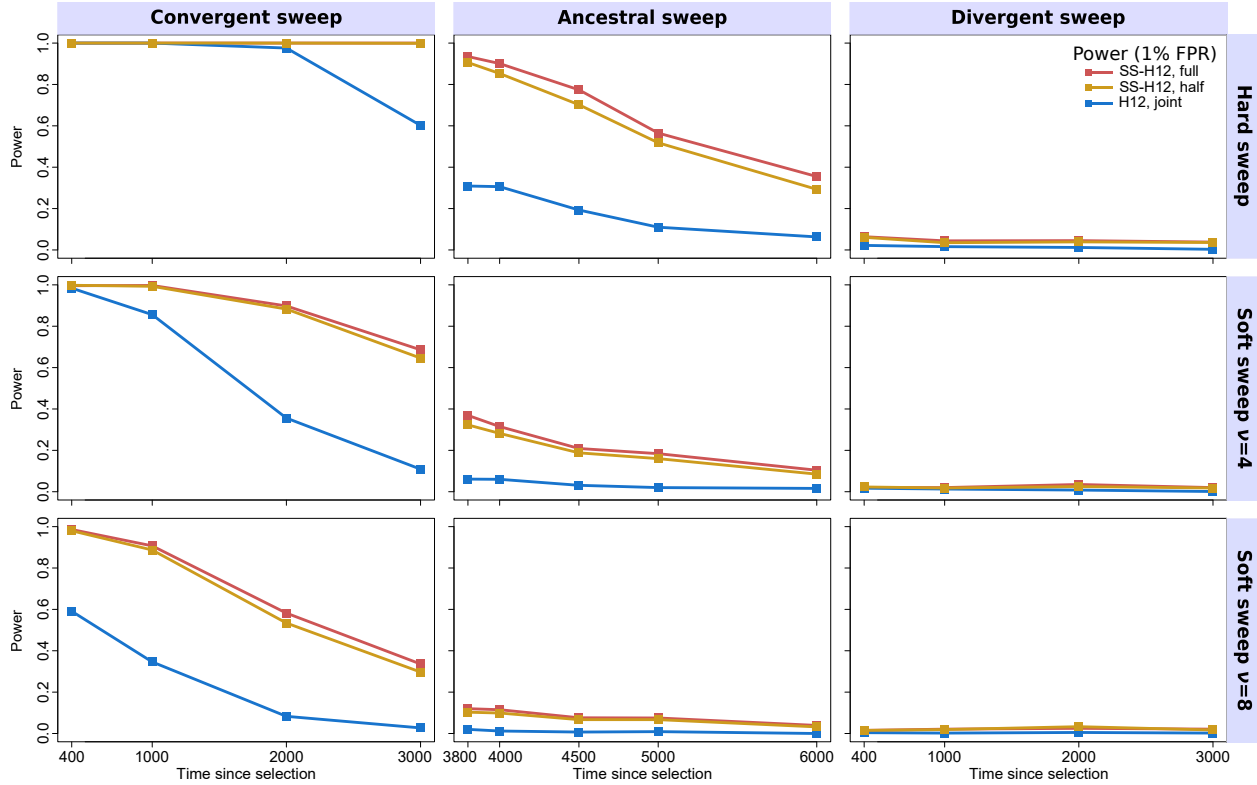

Figure S11: Powers of SS-H12 and H12 at a 1% false positive rate to detect recent ancestral, convergent, and divergent simulated strong ( $s = 0.1$ ) selective sweeps under the CEU-YRI model ( $\tau = 3740$  generations before sampling) for hard (top) and soft ( $\nu = 4$ , middle;  $\nu = 8$ , bottom) sweeps as a function of time at which positive selection of the favored allele initiated ( $t$ ), with FPR based on the distribution of maximum |SS-H12| or H12 across simulated neutral replicates. “SS-H12, full” refers to analyses in which we generated full-size pooled samples consisting of 99 simulated CEU individuals and 108 simulated GIH individuals, while “SS-H12, half” used only half of the alleles in each sample. “H12, joint” analyses used the full sample size for both populations. For convergent and divergent sweeps,  $t < \tau$ , while for ancestral sweeps,  $t > \tau$ . We performed 1000 replicates for each scenario.

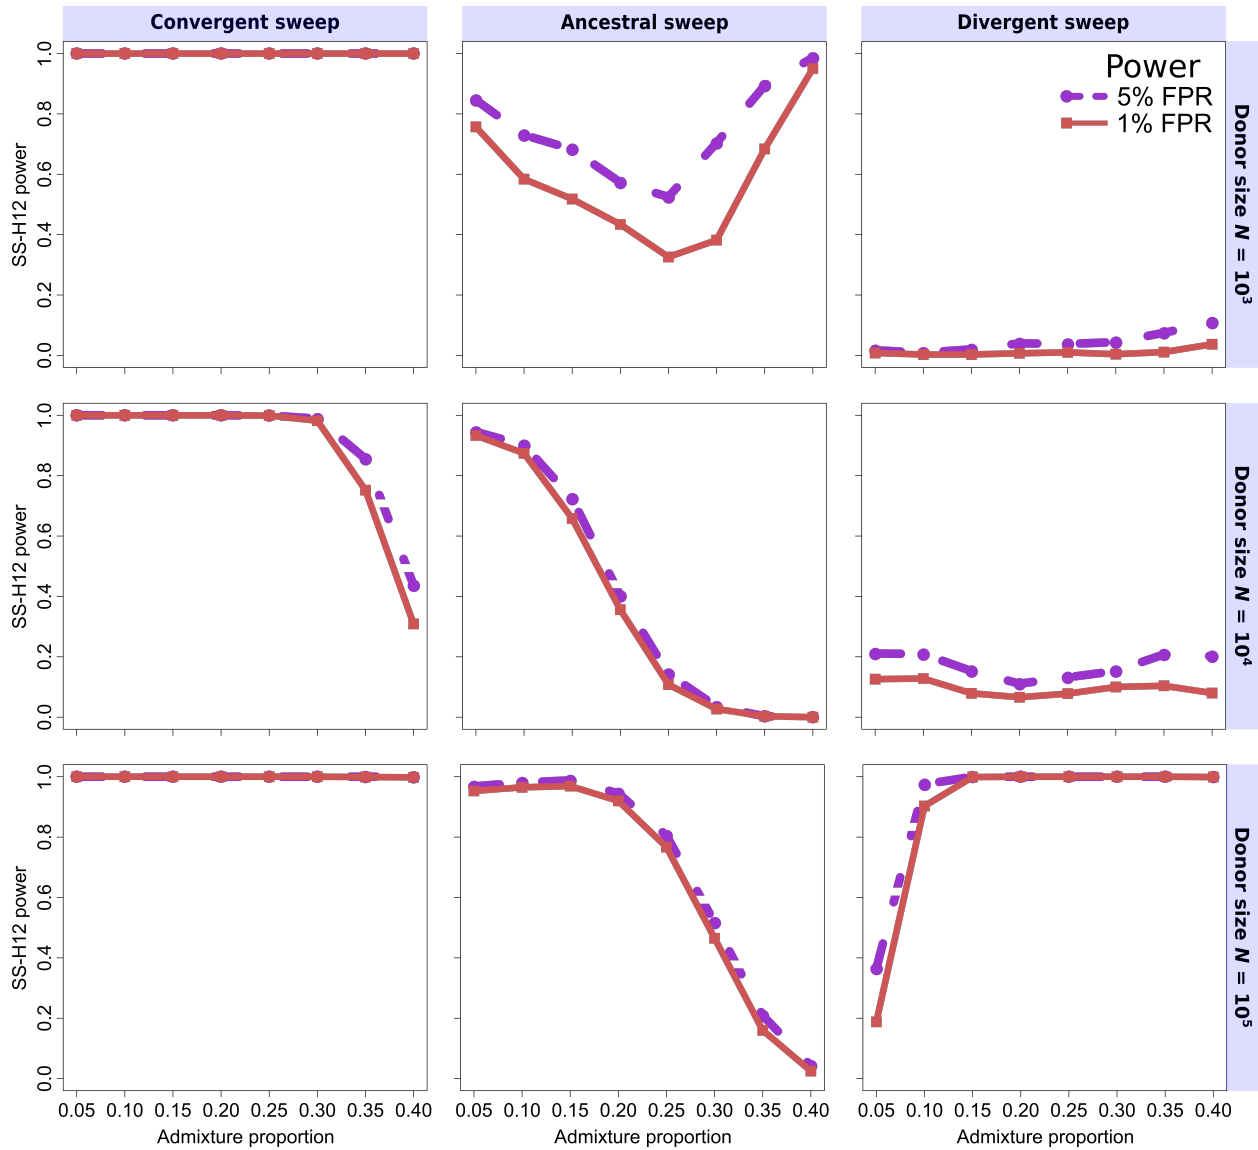

Figure S12: Power at 1 and 5% false positive rates (FPRs) to detect recent strong ( $s = 0.1$ ) ancestral, convergent, and divergent hard sweeps (see Figure 1) as a function of admixture proportion, with false positive rate based on the distribution of maximum  $|\text{SS-H12}|$  across simulated neutral replicates under a given admixture scenario. Data here are simulated as in Figure 4, with scenarios of admixture proportion 0.2, 0.3, and 0.4 identical to Figure 4.

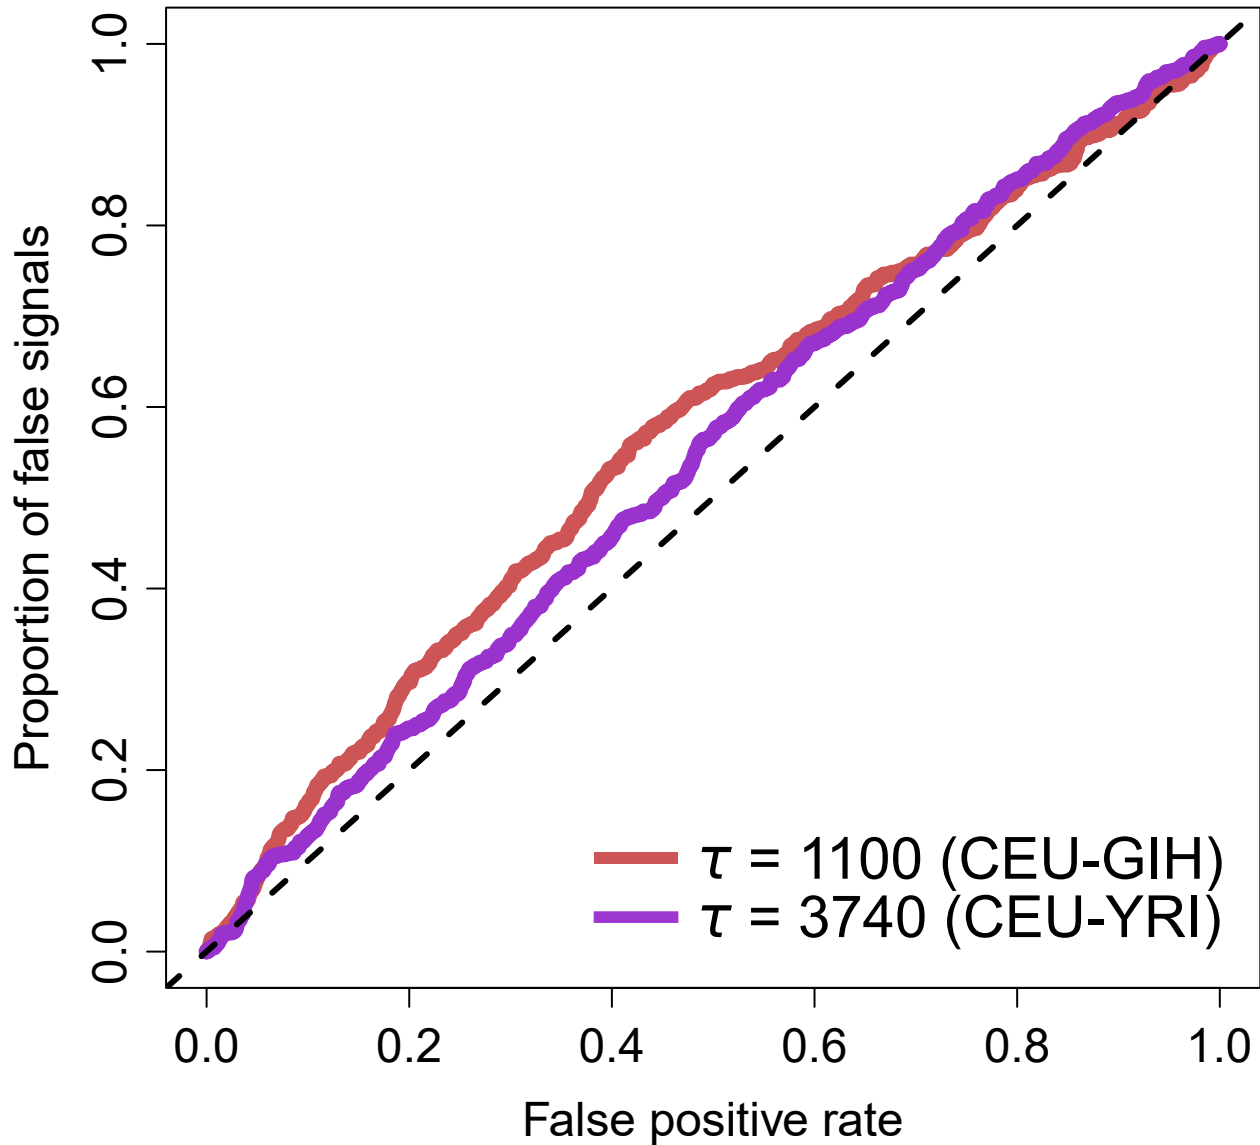

Figure S13: Proportion of false signals generated by background selection as a function of false positive rate based on neutrality for SS-H12 under CEU-GIH (red) or CEU-YRI (purple) demographic models. Neutral replicates used here are identical to those used across Figures 2, 3, and S2-S5. Background selection simulations, totaling 1000 replicates, were generated according to the procedure described in the *Materials and Methods*.



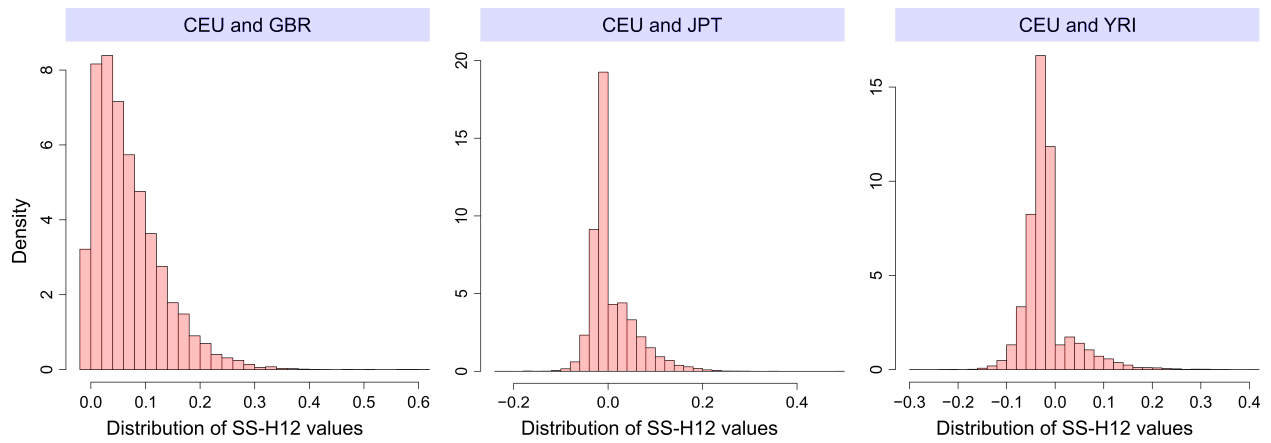

Figure S14: Empirical distributions of SS-H12 values assigned to each protein- and mRNA-coding gene based on the analysis of individuals from the 1000 Genomes Project Consortium [Auton et al., 2015] for three population comparisons with CEU. (Left) Distribution of SS-H12 values between the closely-related CEU and GBR populations of European descent. (Middle) Distribution of SS-H12 values between CEU and the East Asian JPT populations, representing a pair that diverged after the out-of-Africa event. (Right) Distribution of SS-H12 values between CEU and the sub-Saharan African YRI populations, representing a distantly-related population pair. SS-H12 is assigned to each gene from the window of maximum  $|\text{SS-H12}|$  falling between the transcription start and stop of the gene.

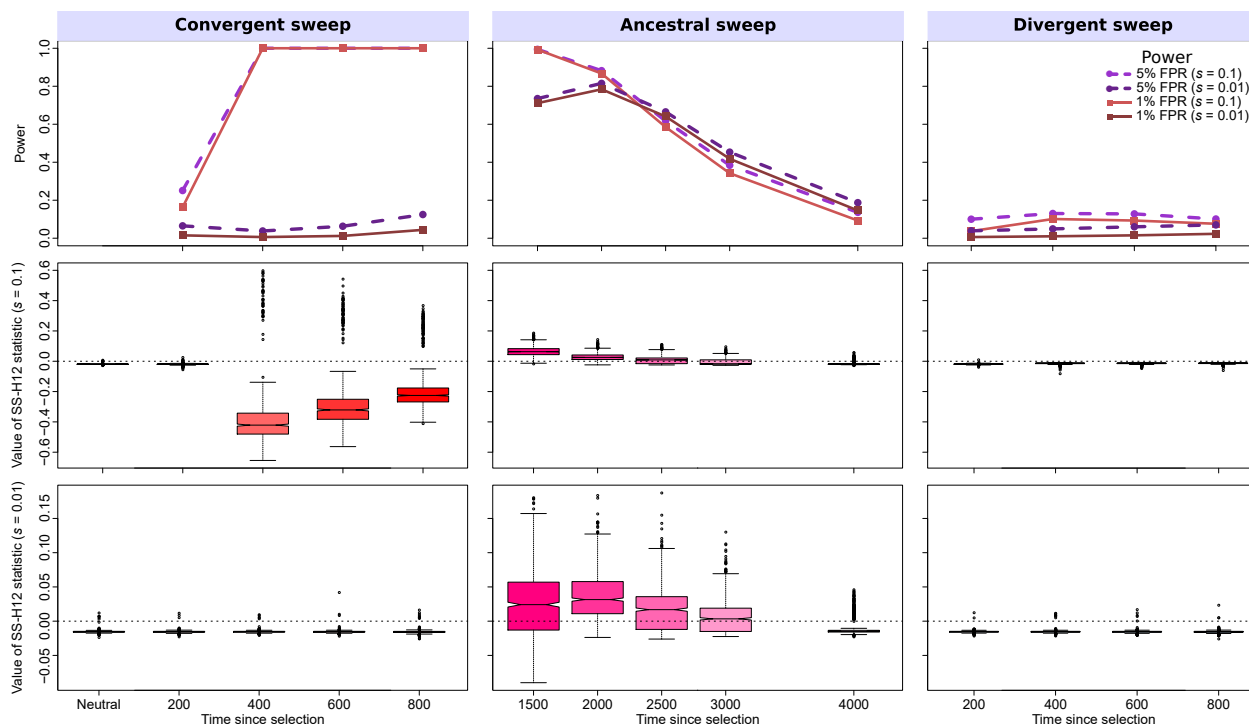

Figure S15: Properties of SS-G123 for simulated strong ( $s = 0.1$ ) and moderate ( $s = 0.01$ ) hard sweep scenarios under the CEU-GIH model ( $\tau = 1100$  generations before sampling). (Top row) Power at 1% (red lines) and 5% (purple lines) false positive rates (FPRs) to detect recent ancestral, convergent, and divergent hard sweeps (see Figure 1) as a function of time at which positive selection of the favored allele initiated ( $t$ ), with FPR based on the distribution of maximum  $|\text{SS-G123}|$  across simulated neutral replicates. (Middle row) Box plots summarizing the distribution of SS-G123 values from windows of maximum  $|\text{SS-G123}|$  across strong sweep replicates, corresponding to each time point in the power curves, with dashed lines in each panel representing  $\text{SS-G123} = 0$ . (Bottom row) Box plots summarizing the distribution of SS-G123 values across moderate sweep replicates. For convergent and divergent sweeps,  $t < \tau$ , while for ancestral sweeps,  $t > \tau$ . Simulated replicates are identical to those in Figure 2, but with each individual's two haplotypes merged into their multilocus genotypes.

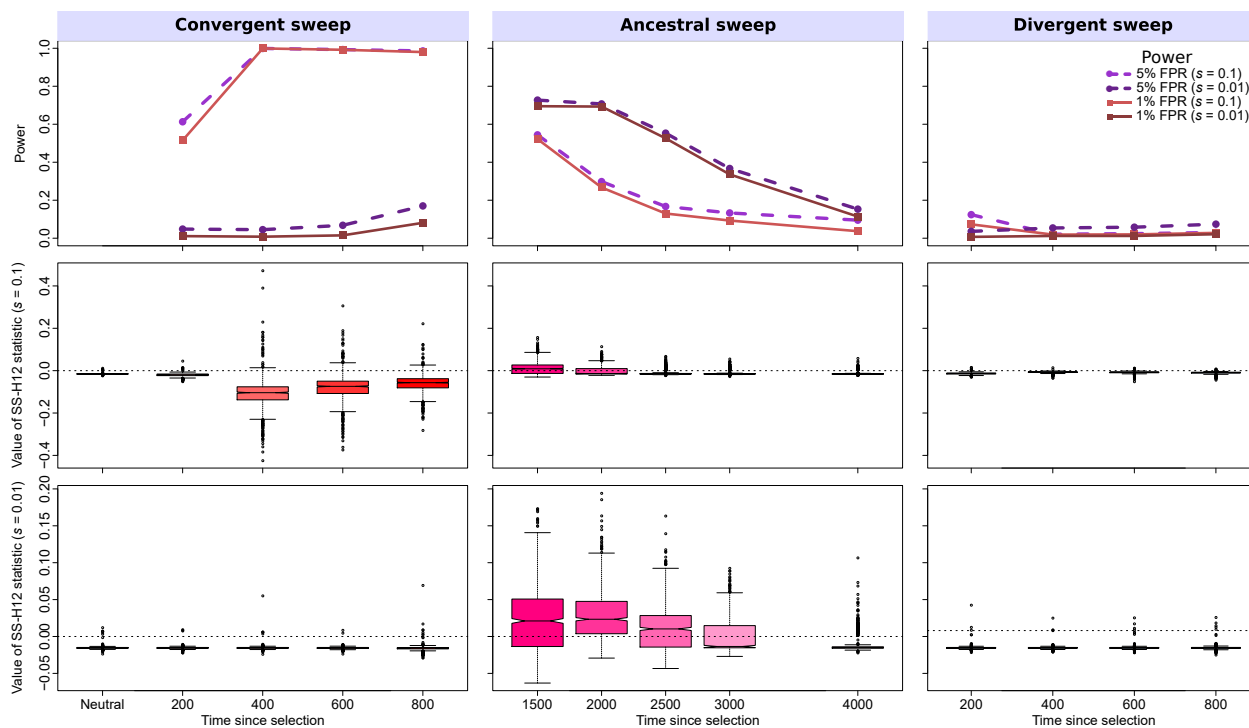

Figure S16: Properties of SS-G123 for simulated strong ( $s = 0.1$ ) and moderate ( $s = 0.01$ ) soft sweep ( $\nu = 4$ ) scenarios under the CEU-GIH model ( $\tau = 1100$  generations before sampling). (Top row) Power at 1% (red lines) and 5% (purple lines) false positive rates (FPRs) to detect recent ancestral, convergent, and divergent soft sweeps from selection on standing genetic variation as a function of time at which selection of the favored haplotypes initiated ( $t$ ), with FPR based on the distribution of maximum  $|\text{SS-G123}|$  across simulated neutral replicates. (Middle row) Box plots summarizing the distribution of SS-G123 values from windows of maximum  $|\text{SS-G123}|$  across strong sweep replicates, corresponding to each time point in the power curves, with dashed lines in each panel representing  $\text{SS-G123} = 0$ . (Bottom row) Box plots summarizing the distribution of SS-G123 values across moderate sweep replicates. For convergent and divergent sweeps,  $t < \tau$ , while for ancestral sweeps,  $t > \tau$ . Simulated replicates are identical to those in Figure S2, but with each individual's two haplotypes merged into their multilocus genotypes.

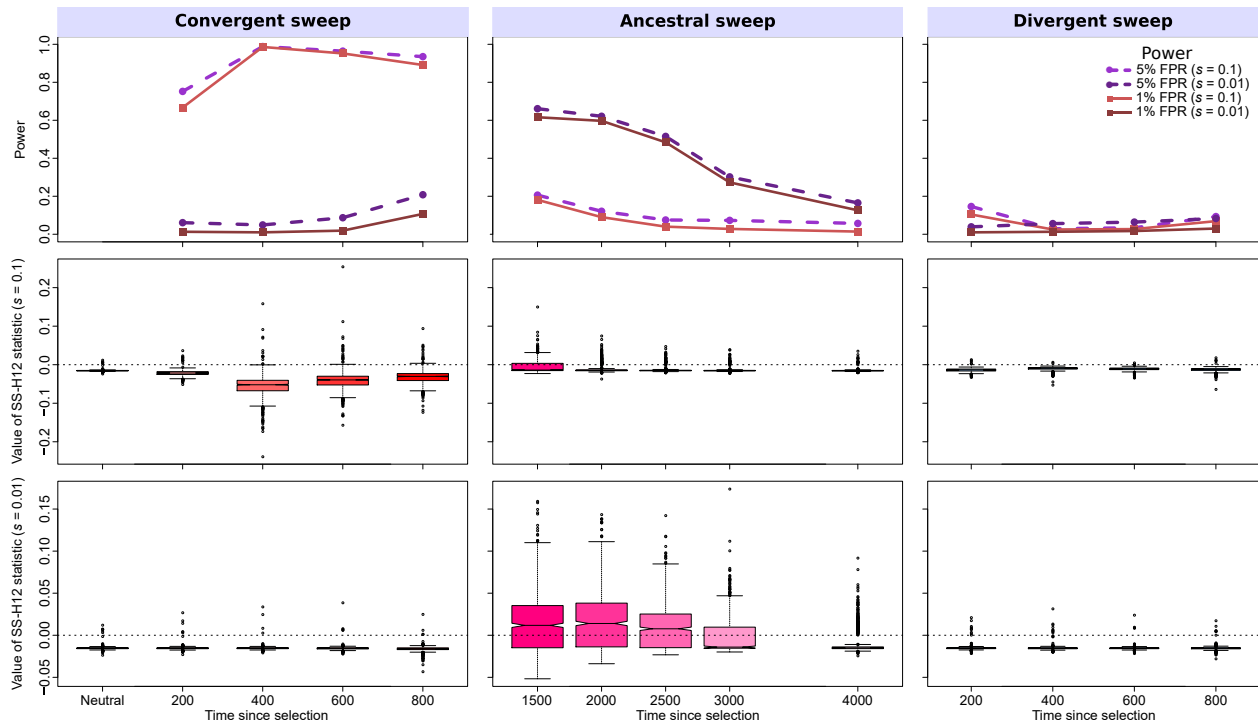

Figure S17: Properties of SS-G123 for simulated strong ( $s = 0.1$ ) and moderate ( $s = 0.01$ ) soft sweep ( $\nu = 8$ ) scenarios under the CEU-GIH model ( $\tau = 1100$  generations before sampling). (Top row) Power at 1% (red lines) and 5% (purple lines) false positive rates (FPRs) to detect recent ancestral, convergent, and divergent soft sweeps from selection on standing genetic variation as a function of time at which selection of the favored haplotypes initiated ( $t$ ), with FPR based on the distribution of maximum  $|\text{SS-G123}|$  across simulated neutral replicates. (Middle row) Box plots summarizing the distribution of SS-G123 values from windows of maximum  $|\text{SS-G123}|$  across strong sweep replicates, corresponding to each time point in the power curves, with dashed lines in each panel representing  $\text{SS-G123} = 0$ . (Bottom row) Box plots summarizing the distribution of SS-G123 values across moderate sweep replicates. For convergent and divergent sweeps,  $t < \tau$ , while for ancestral sweeps,  $t > \tau$ . Simulated replicates are identical to those in Figure S3, but with each individual's two haplotypes merged into their multilocus genotypes.

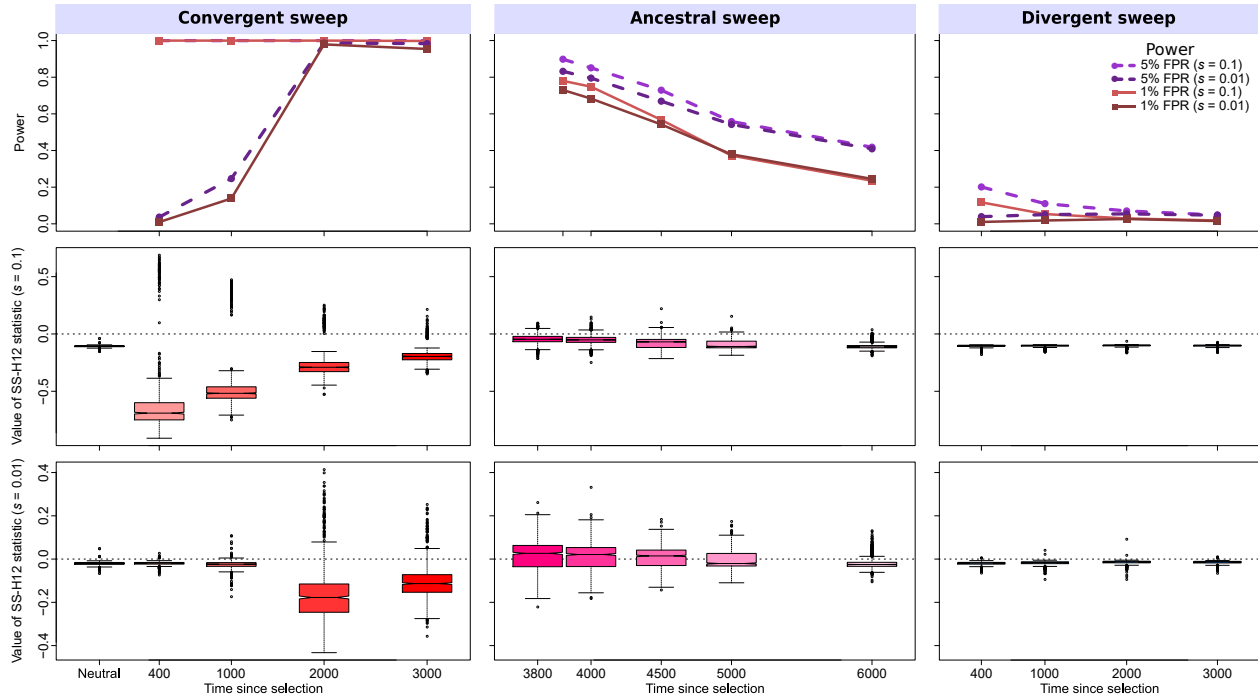

Figure S18: Properties of SS-G123 for simulated strong ( $s = 0.1$ ) and moderate ( $s = 0.01$ ) hard sweep scenarios under the CEU-YRI model ( $\tau = 3740$  generations before sampling). (Top row) Power at 1% (red lines) and 5% (purple lines) false positive rates (FPRs) to detect recent ancestral, convergent, and divergent hard sweeps (see Figure 1) as a function of time at which positive selection of the favored allele initiated ( $t$ ), with FPR based on the distribution of maximum  $|\text{SS-G123}|$  across simulated neutral replicates. (Middle row) Box plots summarizing the distribution of SS-G123 values from windows of maximum  $|\text{SS-G123}|$  across strong sweep replicates, corresponding to each time point in the power curves, with dashed lines in each panel representing  $\text{SS-G123} = 0$ . (Bottom row) Box plots summarizing the distribution of SS-G123 values across moderate sweep replicates. For convergent and divergent sweeps,  $t < \tau$ , while for ancestral sweeps,  $t > \tau$ . Simulated replicates are identical to those in Figure 3, but with each individual's two haplotypes merged into their multilocus genotypes.

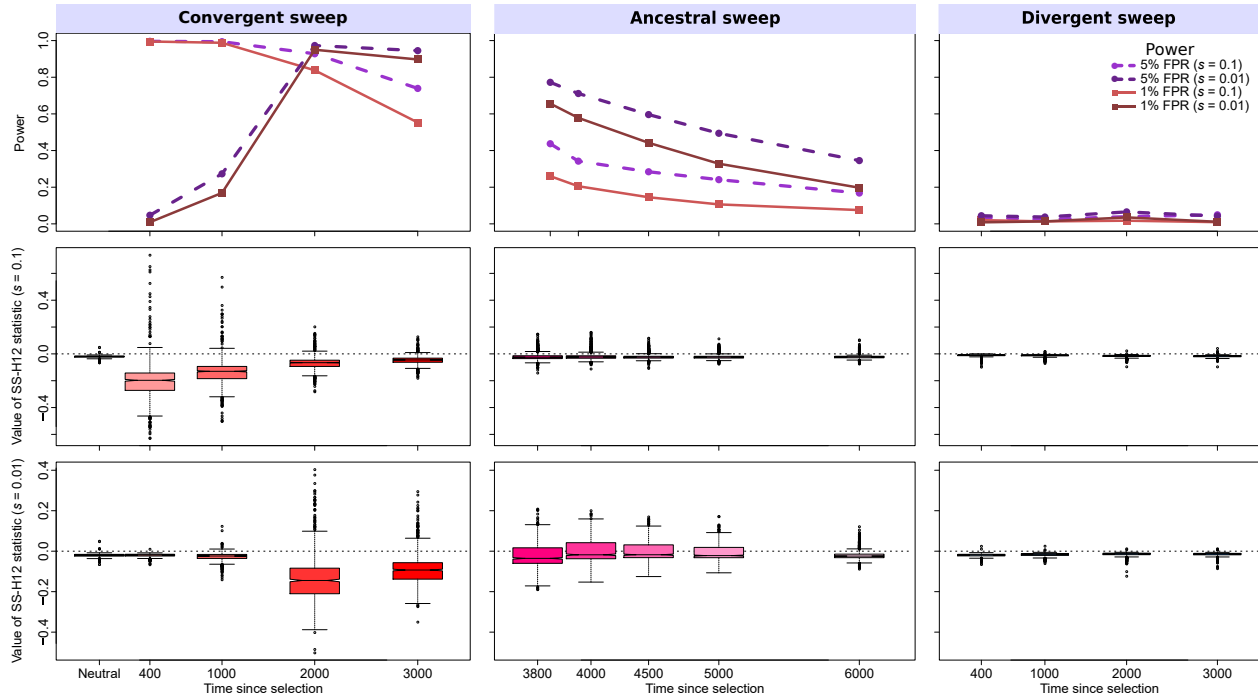

Figure S19: Properties of SS-G123 for simulated strong ( $s = 0.1$ ) and moderate ( $s = 0.01$ ) soft sweep ( $\nu = 4$ ) scenarios under the CEU-YRI model ( $\tau = 3740$  generations before sampling). (Top row) Power at 1% (red lines) and 5% (purple lines) false positive rates (FPRs) to detect recent ancestral, convergent, and divergent soft sweeps from selection on standing genetic variation as a function of time at which selection of the favored haplotypes initiated ( $t$ ), with FPR based on the distribution of maximum  $|\text{SS-G123}|$  across simulated neutral replicates. (Middle row) Box plots summarizing the distribution of SS-G123 values from windows of maximum  $|\text{SS-G123}|$  across strong sweep replicates, corresponding to each time point in the power curves, with dashed lines in each panel representing  $\text{SS-G123} = 0$ . (Bottom row) Box plots summarizing the distribution of SS-G123 values across moderate sweep replicates. For convergent and divergent sweeps,  $t < \tau$ , while for ancestral sweeps,  $t > \tau$ . Simulated replicates are identical to those in Figure S4, but with each individual's two haplotypes merged into their multilocus genotypes.

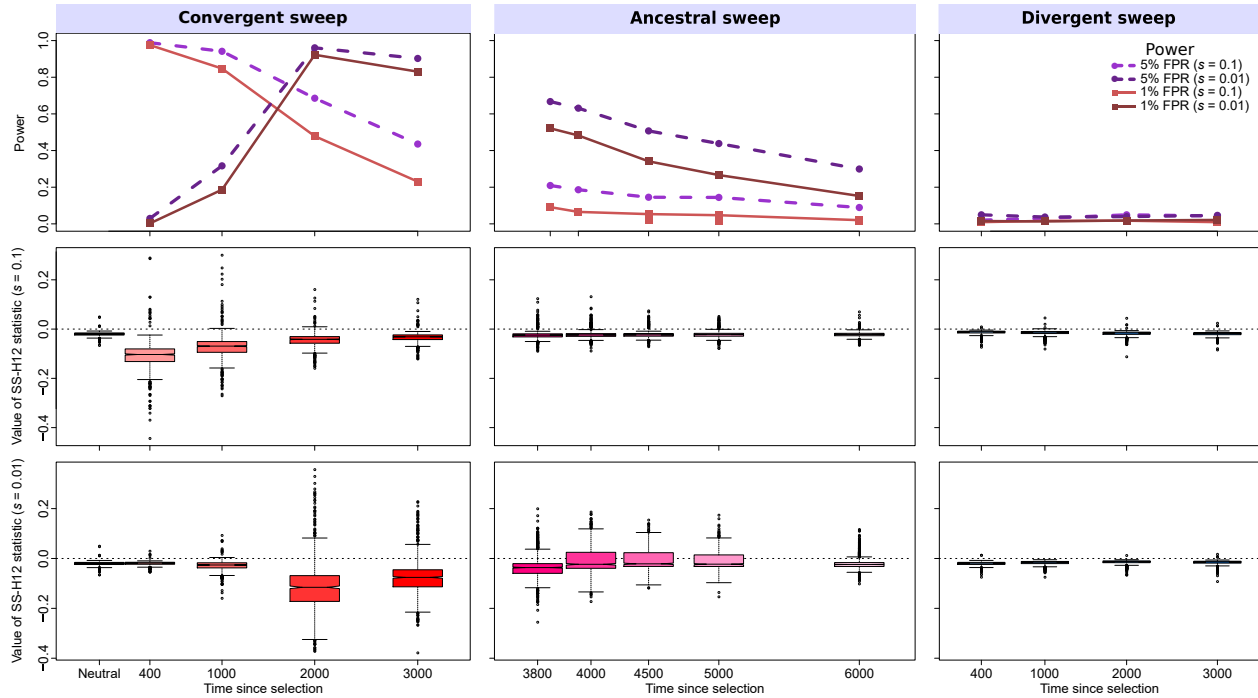

Figure S20: Properties of SS-G123 for simulated strong ( $s = 0.1$ ) and moderate ( $s = 0.01$ ) soft sweep ( $\nu = 8$ ) scenarios under the CEU-YRI model ( $\tau = 3740$  generations before sampling). (Top row) Power at 1% (red lines) and 5% (purple lines) false positive rates (FPRs) to detect recent ancestral, convergent, and divergent soft sweeps from selection on standing genetic variation as a function of time at which selection of the favored haplotypes initiated ( $t$ ), with FPR based on the distribution of maximum  $|\text{SS-G123}|$  across simulated neutral replicates. (Middle row) Box plots summarizing the distribution of SS-G123 values from windows of maximum  $|\text{SS-G123}|$  across strong sweep replicates, corresponding to each time point in the power curves, with dashed lines in each panel representing  $\text{SS-G123} = 0$ . (Bottom row) Box plots summarizing the distribution of SS-G123 values across moderate sweep replicates. For convergent and divergent sweeps,  $t < \tau$ , while for ancestral sweeps,  $t > \tau$ . Simulated replicates are identical to those in Figure S5, but with each individual's two haplotypes merged into their multilocus genotypes.

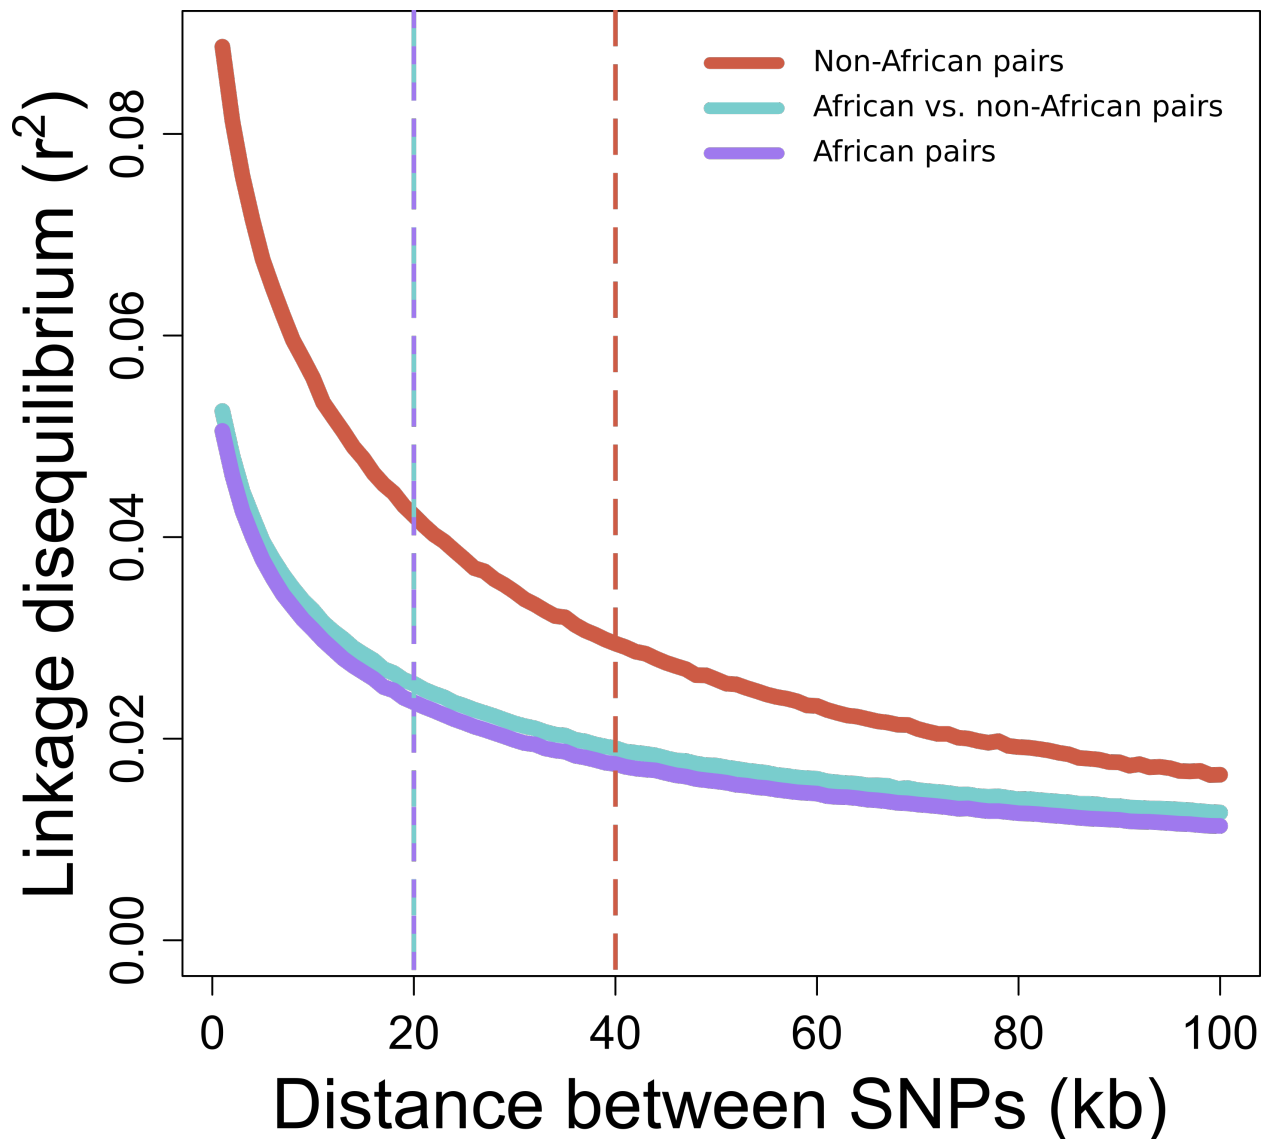

Figure S21: Mean decay of pairwise linkage disequilibrium (LD) measured by  $r^2$  over one to 100 kb intervals downstream of each SNP for pooled population pair samples from the 1000 Genomes Project dataset [Auton et al., 2015]. We used the pooled CEU-JPT sample as representative of LD between non-African population pairs (red), the pooled CEU-YRI population as representative of LD between African and non-African population pairs (cyan), and the pooled LWK-YRI population as representative of the LD between African population pairs (purple). All samples are identical to those analyzed in the *Results* section.
